# Supplementary material for: Before It Gets Started: Regulating Translation at the 5′ UTR
Source: Comp Funct Genomics. 2012 May 28;2012:475731. doi: 10.1155/2012/475731 (PMC3368165; doi:10.1155/2012/475731)
Supplement: Supplementary file 1 — We summarized the basic statistics for uORFs in human transcriptome (NCBI build37.3). Table 1.a shows the number of appearances of uORF-like sequences which contains AUG in 5′ UTRs in terms of mRNAs and genes. Also, we separated out two distinctive uORF-like sequences with matching termination codon in 5′ UTRs or without matching termination codon in 5′ UTRs. The detailed information for these two cases is listed in Table 1.b. Finally, Table 1.c shows how many uORF-like sequences are appeared on an individual 5′ UTR of each mRNA. [file 475731.f1.xlsx]

## Sheet: Summary
Table 1.a
Total number of mRNAs w/ 5' UTRs tested	28399
Total number of genes w/ 5' UTRs tested	16712
Number of mRNA w/ ATG in 5' UTRs	15159
Number of genes w/ ATG in 5' UTRs	8830
Total number of ATGs in 5' UTRs	45510
Number of ATG in 5' UTRs with matching termination codon in 5' UTR	38301
Number of ATG in 5' UTRs without matching termination codon in 5' UTR	7209

## Sheet: List
Table 1.b
RNA ID	Start Codon for MCS	Stop Codon for MCS	uATG Position	uATG Sequence	Matching Stop Codon for the uAUG in the 5' UTR
NM_000014	114	4538	52	ATGGATT	Y
NM_001160170	692	1564	20	ATGTGGG	Y
NM_001160170	692	1564	96	ATGGACT	Y
NM_001160170	692	1564	184	ATGCTGC	Y
NM_001160170	692	1564	195	ATGCCCT	Y
NM_001160170	692	1564	205	ATGAGGC	Y
NM_001160170	692	1564	220	ATGCTCT	Y
NM_001160170	692	1564	232	ATGTCCA	Y
NM_001160170	692	1564	291	ATGTGTG	Y
NM_001160170	692	1564	341	ATGTGAA	Y
NM_001160170	692	1564	579	ATGGTAA	Y
NM_001160176	90	1148	20	ATGTGGG	Y
NM_001160172	463	1335	20	ATGTGGG	Y
NM_001160172	463	1335	96	ATGGACT	Y
NM_001160172	463	1335	184	ATGCTGC	Y
NM_001160172	463	1335	195	ATGCCCT	Y
NM_001160172	463	1335	205	ATGAGGC	Y
NM_001160172	463	1335	220	ATGCTCT	Y
NM_001160172	463	1335	232	ATGTCCA	Y
NM_001160172	463	1335	291	ATGTGTG	Y
NM_001160172	463	1335	341	ATGTGAA	Y
NM_000662	158	1030	20	ATGTGGG	Y
NM_001160179	368	1240	164	ATGGGAC	Y
NM_001160179	368	1240	241	ATGGGGA	Y
NM_001160179	368	1240	280	ATGAATT	Y
NM_001160173	308	1180	20	ATGTGGG	Y
NM_001160173	308	1180	96	ATGGACT	Y
NM_001160173	308	1180	184	ATGCTGC	Y
NM_001160173	308	1180	195	ATGCCCT	Y
NM_001160173	308	1180	205	ATGAGGC	Y
NM_001160173	308	1180	220	ATGAATT	Y
NM_001160175	240	1298	20	ATGTGGG	Y
NM_001160175	240	1298	96	ATGGACT	Y
NM_001160175	240	1298	184	ATGCTGC	N
NM_001160175	240	1298	195	ATGCCCT	Y
NM_001160175	240	1298	205	ATGAGGC	N
NM_001160175	240	1298	220	ATGACGT	N
NM_001160171	542	1414	20	ATGTGGG	Y
NM_001160171	542	1414	82	ATGTCCA	Y
NM_001160171	542	1414	141	ATGTGTG	Y
NM_001160171	542	1414	191	ATGTGAA	Y
NM_001160171	542	1414	429	ATGGTAA	Y
NM_001160174	381	1253	11	ATGATTC	Y
NM_001160174	381	1253	102	ATGAACA	Y
NM_001160174	381	1253	216	ATGTGTG	Y
NM_001160174	381	1253	240	ATGAAAG	Y
NM_001160174	381	1253	289	ATGTTTA	Y
NM_001160174	381	1253	342	ATGATTT	Y
NM_001085	80	1351	5	ATGAAAA	N
NM_001086	91	1290	40	ATGTAGG	Y
NM_001166579	1008	1766	1	ATGGAAT	Y
NM_001166579	1008	1766	130	ATGGTGG	Y
NM_001166579	1008	1766	158	ATGAGCT	Y
NM_001166579	1008	1766	337	ATGTATA	Y
NM_001166579	1008	1766	344	ATGCACT	Y
NM_001166579	1008	1766	382	ATGACCC	Y
NM_001166579	1008	1766	481	ATGTCAG	Y
NM_001166579	1008	1766	537	ATGTGAC	Y
NM_001166579	1008	1766	675	ATGAAGC	Y
NM_001166579	1008	1766	703	ATGCAGG	Y
NM_001166579	1008	1766	914	ATGTGGA	Y
NM_001127448	261	1763	59	ATGTCCT	Y
NM_001127448	261	1763	113	ATGAGAG	Y
NM_001127448	261	1763	164	ATGATGC	N
NM_001127448	261	1763	167	ATGCATG	N
NM_001127448	261	1763	171	ATGCAAA	Y
NM_000663	939	2441	59	ATGGGCT	Y
NM_000663	939	2441	69	ATGGGGG	Y
NM_000663	939	2441	177	ATGACTT	Y
NM_000663	939	2441	205	ATGGCTG	Y
NM_000663	939	2441	392	ATGATGT	Y
NM_000663	939	2441	395	ATGTGTC	Y
NM_000663	939	2441	721	ATGTTTT	Y
NM_000663	939	2441	795	ATGAACC	Y
NM_000663	939	2441	831	ATGGCAT	Y
NM_005502	405	7190	316	ATGACCA	N
NM_001606	149	7459	61	ATGCCCA	Y
NM_001089	713	5827	188	ATGCCTG	Y
NM_001089	713	5827	215	ATGTCCT	Y
NM_001089	713	5827	384	ATGAGTG	Y
NM_001089	713	5827	451	ATGAAGG	N
NM_000350	105	6926	43	ATGTCCT	Y
NM_007313	440	3889	63	ATGTGTG	Y
NM_007313	440	3889	79	ATGACTA	Y
NM_007313	440	3889	210	ATGAAAT	Y
NM_007313	440	3889	286	ATGGAAG	Y
NM_007313	440	3889	293	ATGTCTT	Y
NM_007313	440	3889	333	ATGCAGC	Y
NM_007313	440	3889	342	ATGTGAA	Y
NM_007313	440	3889	360	ATGCCAT	Y
NM_007314	288	3836	17	ATGGCGG	Y
NM_007314	288	3836	242	ATGTGAC	Y
NM_001168236	288	3773	17	ATGGCGG	Y
NM_001168236	288	3773	242	ATGTGAC	Y
NM_001168237	288	3527	17	ATGGCGG	Y
NM_001168237	288	3527	242	ATGTGAC	Y
NM_001136001	288	1916	17	ATGGCGG	Y
NM_001136001	288	1916	242	ATGTGAC	Y
NM_001168238	288	3464	17	ATGGCGG	Y
NM_001168238	288	3464	242	ATGTGAC	Y
NM_021962	111	2690	69	ATGAGGG	Y
NM_001159746	601	3042	96	ATGGCAG	Y
NM_001159746	601	3042	149	ATGGTGA	Y
NM_001159746	601	3042	224	ATGGGGA	Y
NM_001159746	601	3042	287	ATGCGTC	Y
NM_001159746	601	3042	504	ATGCTGA	Y
NM_001159746	601	3042	510	ATGGGGA	Y
NM_001159746	601	3042	563	ATGAGGA	N
NM_001130410	208	1203	119	ATGTGGT	Y
NM_001607	208	1482	119	ATGTGGT	Y
NM_198834	514	7665	100	ATGGGGC	Y
NM_198834	514	7665	376	ATGAACC	Y
NM_198834	514	7665	423	ATGCTTC	Y
NM_198834	514	7665	503	ATGATGA	N
NM_198834	514	7665	506	ATGAGAG	N
NM_198837	436	7302	67	ATGTTTG	Y
NM_198837	436	7302	206	ATGCAAA	Y
NM_198838	607	7413	67	ATGTTTG	Y
NM_198838	607	7413	206	ATGCAAA	Y
NM_198838	607	7413	436	ATGGAGG	Y
NM_198838	607	7413	466	ATGAGAT	Y
NM_198838	607	7413	478	ATGCTTC	Y
NM_198838	607	7413	510	ATGAAGT	Y
NM_198838	607	7413	542	ATGAGGA	N
NM_198838	607	7413	552	ATGAAGA	N
NM_198838	607	7413	560	ATGTTTG	N
NM_198839	1299	8339	100	ATGGGGC	Y
NM_198839	1299	8339	376	ATGAACC	Y
NM_198839	1299	8339	423	ATGCTTC	Y
NM_198839	1299	8339	503	ATGATGA	Y
NM_198839	1299	8339	506	ATGAGAG	Y
NM_198839	1299	8339	514	ATGTGGT	Y
NM_198839	1299	8339	532	ATGTCAA	Y
NM_198839	1299	8339	561	ATGTCAC	Y
NM_198839	1299	8339	681	ATGGCAT	Y
NM_198839	1299	8339	686	ATGATCT	Y
NM_198839	1299	8339	798	ATGAAGT	Y
NM_198839	1299	8339	833	ATGGTAT	Y
NM_198839	1299	8339	838	ATGAAGT	Y
NM_198839	1299	8339	987	ATGAATT	Y
NM_198839	1299	8339	1223	ATGGTCT	N
NM_001127328	431	1708	175	ATGCGAC	Y
NM_001127328	431	1708	226	ATGCGTT	Y
NM_001127328	431	1708	376	ATGTCAA	Y
NM_000016	431	1696	175	ATGCGAC	Y
NM_000016	431	1696	226	ATGCGTT	Y
NM_000016	431	1696	376	ATGTCAA	Y
NM_001033859	152	2053	14	ATGCCCC	N
NM_001033859	152	2053	60	ATGAGTC	Y
NM_000018	152	2119	14	ATGCCCC	N
NM_000018	152	2119	60	ATGAGTC	Y
NM_183377	874	2565	391	ATGTCCA	Y
NM_183377	874	2565	406	ATGGTGG	Y
NM_183377	874	2565	719	ATGCCGC	N
NM_183377	874	2565	817	ATGGCGG	N
NM_183377	874	2565	870	ATGAATG	N
NM_001094	275	1813	82	ATGGGTT	Y
NM_001094	275	1813	157	ATGCTTG	Y
NM_001095	230	1816	123	ATGAGCC	Y
NM_020039	230	1954	123	ATGAGCC	Y
NM_001096	164	3469	6	ATGGGGG	N
NM_198830	164	3439	6	ATGGGGG	N
NM_001185039	650	2518	362	ATGAACC	Y
NM_001185039	650	2518	528	ATGCGGA	Y
NM_001131064	118	600	8	ATGGCGG	N
NM_001610	118	1389	8	ATGGCGG	N
NM_001111035	304	1281	163	ATGTCCG	Y
NM_001611	147	1124	40	ATGATCC	Y
NM_001111034	281	1258	22	ATGGGGG	Y
NM_001111034	281	1258	89	ATGAGAG	Y
NM_001111034	281	1258	140	ATGTCCG	Y
NM_005159	244	1377	31	ATGAATG	Y
NM_005159	244	1377	35	ATGGCCT	Y
NM_001615	123	1253	32	ATGCCAA	N
NM_001199893	123	1124	32	ATGCCAA	N
NM_177989	156	1319	55	ATGAAGT	Y
NM_177989	156	1319	109	ATGCTGG	N
NM_178042	348	1511	174	ATGAGCG	Y
NM_178042	348	1511	247	ATGAAGT	Y
NM_178042	348	1511	301	ATGCTGG	N
NM_001105	431	1960	7	ATGTGGG	Y
NM_001105	431	1960	144	ATGGGAG	Y
NM_001105	431	1960	218	ATGAATT	Y
NM_001105	431	1960	400	ATGTGAC	Y
NM_001111067	250	1779	219	ATGTGAC	Y
NM_020327	186	1547	2	ATGCTTC	Y
NM_020327	186	1547	85	ATGGTGA	N
NM_020327	186	1547	98	ATGAACA	Y
NM_020327	186	1547	175	ATGGGGC	N
NM_001616	153	1694	45	ATGTTTT	Y
NM_001616	153	1694	52	ATGACGG	N
NM_001077401	147	1658	105	ATGGCTC	N
NM_138448	427	726	136	ATGGTAG	Y
NM_138448	427	726	193	ATGCCTG	Y
NM_138448	427	726	343	ATGTGTC	N
NM_001110	445	2691	43	ATGCGCG	Y
NM_001110	445	2691	77	ATGGGCG	Y
NM_001110	445	2691	391	ATGTGCT	Y
NM_001111	243	3923	227	ATGCCTC	N
NM_015840	243	3845	227	ATGCCTC	N
NM_015841	243	3788	227	ATGCCTC	N
NM_001025107	997	3792	170	ATGAGCA	Y
NM_001025107	997	3792	587	ATGATCT	Y
NM_001193495	1166	3961	58	ATGGTGA	Y
NM_001193495	1166	3961	234	ATGCCAC	Y
NM_001193495	1166	3961	339	ATGAGCA	Y
NM_001193495	1166	3961	756	ATGATCT	Y
NM_001112	436	2541	238	ATGGAGA	Y
NM_015834	436	2580	238	ATGGAGA	Y
NM_001160230	436	2460	238	ATGGAGA	Y
NM_015833	436	2661	238	ATGGAGA	Y
NM_021116	19	3378	8	ATGGCGC	N
NM_001199642	76	2811	6	ATGTCCT	Y
NM_015270	661	4167	52	ATGGCGC	Y
NM_015270	661	4167	520	ATGAGGA	Y
NM_015270	661	4167	526	ATGAAAC	Y
NM_015270	661	4167	564	ATGAGCT	Y
NM_015270	661	4167	593	ATGGTGG	Y
NM_015270	661	4167	621	ATGGTCT	N
NM_001114	269	3511	37	ATGCACA	Y
NM_001114	269	3511	49	ATGCTGG	Y
NM_001114	269	3511	108	ATGGAGC	Y
NM_001114	269	3511	205	ATGCCCT	N
NM_001115	257	4012	91	ATGACCC	Y
NM_001116	540	4601	264	ATGGAGG	Y
NM_001099733	120	650	22	ATGCCTC	Y
NM_001617	512	2692	72	ATGGCTT	Y
NM_001617	512	2692	229	ATGGGCA	Y
NM_001617	512	2692	345	ATGCCGC	Y
NM_001617	512	2692	370	ATGTTTG	Y
NM_001617	512	2692	388	ATGTGGC	Y
NM_017482	512	2191	72	ATGGCTT	Y
NM_017482	512	2191	229	ATGGGCA	Y
NM_017482	512	2191	345	ATGCCGC	Y
NM_017482	512	2191	370	ATGTTTG	Y
NM_017482	512	2191	388	ATGTGGC	Y
NM_017488	512	2443	72	ATGGCTT	Y
NM_017488	512	2443	229	ATGGGCA	Y
NM_017488	512	2443	345	ATGCCGC	Y
NM_017488	512	2443	370	ATGTTTG	Y
NM_017488	512	2443	388	ATGTGGC	Y
NM_001185054	266	2446	15	ATGATGT	Y
NM_001185054	266	2446	18	ATGTAGC	Y
NM_001185054	266	2446	76	ATGGTGG	Y
NM_001185054	266	2446	124	ATGTTTG	Y
NM_001185054	266	2446	142	ATGTGGC	Y
NM_001185055	345	2072	72	ATGGCTT	Y
NM_001185055	345	2072	229	ATGGGCA	Y
NM_019903	214	2238	21	ATGCTGC	Y
NM_000667	115	1242	26	ATGCAAT	N
NM_000667	115	1242	44	ATGCACT	N
NM_000668	85	1212	15	ATGCACT	N
NM_000669	86	1213	15	ATGCACT	N
NM_000671	81	1205	16	ATGCCTC	Y
NM_000671	81	1205	46	ATGTCAG	Y
NM_000673	242	1402	178	ATGTGAA	Y
NM_001202450	95	1012	19	ATGCGAA	N
NM_001202450	95	1012	49	ATGGCAG	N
NM_006721	95	1183	19	ATGCGAA	N
NM_006721	95	1183	49	ATGGCAG	N
NM_001202449	385	1368	79	ATGGCCA	Y
NM_001123	385	1422	79	ATGGCCA	Y
NM_001048230	279	1259	257	ATGTGCC	N
NM_000674	434	1414	259	ATGAGCT	N
NM_000674	434	1414	374	ATGGTGC	Y
NM_000674	434	1414	412	ATGTGCC	N
NM_000675	460	1698	14	ATGTGAG	Y
NM_000675	460	1698	69	ATGGAGC	Y
NM_000675	460	1698	218	ATGATGC	Y
NM_000675	460	1698	221	ATGCTGC	Y
NM_000675	460	1698	402	ATGGACC	N
NM_000676	333	1331	140	ATGGGTG	N
NM_000676	333	1331	247	ATGGCCA	Y
NM_000676	333	1331	253	ATGCCCG	Y
NM_020683	768	1811	149	ATGAGAT	Y
NM_020683	768	1811	242	ATGAATG	Y
NM_020683	768	1811	246	ATGAACT	Y
NM_020683	768	1811	284	ATGCCAC	Y
NM_020683	768	1811	293	ATGGCTC	Y
NM_020683	768	1811	403	ATGGAAC	Y
NM_020683	768	1811	531	ATGTGCG	Y
NM_020683	768	1811	571	ATGAGCC	Y
NM_020683	768	1811	630	ATGAGCA	Y
NM_020683	768	1811	665	ATGGACC	N
NM_000677	768	1724	149	ATGAGAT	Y
NM_000677	768	1724	242	ATGAATG	Y
NM_000677	768	1724	246	ATGAACT	Y
NM_000677	768	1724	284	ATGCCAC	Y
NM_000677	768	1724	293	ATGGCTC	Y
NM_000677	768	1724	403	ATGGAAC	Y
NM_000677	768	1724	531	ATGTGCG	Y
NM_000677	768	1724	571	ATGAGCC	Y
NM_000677	768	1724	630	ATGAGCA	Y
NM_000677	768	1724	665	ATGGACC	N
NM_001125	299	1372	198	ATGGCCA	Y
NM_000679	174	1736	41	ATGACTC	Y
NM_000679	174	1736	155	ATGGAGG	Y
NM_033302	437	1726	13	ATGTGCA	Y
NM_033302	437	1726	22	ATGCTGA	Y
NM_033302	437	1726	94	ATGTTGC	Y
NM_033302	437	1726	215	ATGTCTT	Y
NM_033302	437	1726	224	ATGCCCT	Y
NM_033302	437	1726	239	ATGTGGC	Y
NM_000680	437	1837	13	ATGTGCA	Y
NM_000680	437	1837	22	ATGCTGA	Y
NM_000680	437	1837	94	ATGTTGC	Y
NM_000680	437	1837	215	ATGTCTT	Y
NM_000680	437	1837	224	ATGCCCT	Y
NM_000680	437	1837	239	ATGTGGC	Y
NM_033303	437	1864	13	ATGTGCA	Y
NM_033303	437	1864	22	ATGCTGA	Y
NM_033303	437	1864	94	ATGTTGC	Y
NM_033303	437	1864	215	ATGTCTT	Y
NM_033303	437	1864	224	ATGCCCT	Y
NM_033303	437	1864	239	ATGTGGC	Y
NM_033304	437	1804	13	ATGTGCA	Y
NM_033304	437	1804	22	ATGCTGA	Y
NM_033304	437	1804	94	ATGTTGC	Y
NM_033304	437	1804	215	ATGTCTT	Y
NM_033304	437	1804	224	ATGCCCT	Y
NM_033304	437	1804	239	ATGTGGC	Y
NM_000681	966	2363	242	ATGCGGC	Y
NM_000681	966	2363	443	ATGTAAG	Y
NM_000681	966	2363	579	ATGTATA	Y
NM_000681	966	2363	631	ATGATTT	Y
NM_000681	966	2363	803	ATGGGCC	Y
NM_000681	966	2363	858	ATGTGAG	Y
NM_000024	240	1481	139	ATGAGGC	Y
NM_000025	198	1424	84	ATGGCCC	Y
NM_000025	198	1424	111	ATGCCTT	Y
NM_001619	267	2336	90	ATGGGGC	Y
NM_001126	318	1688	122	ATGGTAC	Y
NM_001126	318	1688	232	ATGTGGC	N
NM_001128	315	2783	242	ATGTTCG	N
NM_001030007	315	2792	242	ATGTTCG	N
NM_001133	32	1831	15	ATGTGGT	N
NM_000642	401	4999	370	ATGAAAG	N
NM_000643	199	4797	86	ATGGGGA	Y
NM_000643	199	4797	168	ATGAAAG	N
NM_000645	263	4810	31	ATGTGAA	Y
NM_000645	263	4810	43	ATGCGTT	Y
NM_000645	263	4810	92	ATGATGT	Y
NM_000645	263	4810	95	ATGTTTA	Y
NM_000645	263	4810	116	ATGTGAA	Y
NM_000645	263	4810	241	ATGTGGT	Y
NM_000644	139	4737	86	ATGGGGA	Y
NM_000028	479	5077	86	ATGGGGA	Y
NM_000028	479	5077	184	ATGTCCC	Y
NM_000028	479	5077	233	ATGGTCT	Y
NM_000028	479	5077	409	ATGGGTA	N
NM_000028	479	5077	448	ATGAAAG	N
NM_000646	260	4810	38	ATGAAAG	Y
NM_000646	260	4810	69	ATGGGAC	N
NM_000646	260	4810	111	ATGGAGA	N
NM_000646	260	4810	166	ATGTTGC	Y
NM_000214	517	4173	167	ATGCAGC	Y
NM_000214	517	4173	383	ATGCTCC	N
NM_000029	509	1966	6	ATGAGCG	Y
NM_000029	509	1966	93	ATGTCCC	Y
NM_000029	509	1966	182	ATGCTCC	Y
NM_000029	509	1966	232	ATGTGTA	Y
NM_000029	509	1966	374	ATGTAAC	Y
NM_004835	363	1442	30	ATGATTC	Y
NM_004835	363	1442	132	ATGGGGA	Y
NM_004835	363	1442	258	ATGAAGA	N
NM_004835	363	1442	267	ATGAATC	N
NM_000685	389	1468	30	ATGATTC	Y
NM_000685	389	1468	132	ATGGGGA	Y
NM_000685	389	1468	285	ATGGCTG	Y
NM_000685	389	1468	316	ATGCCAT	Y
NM_031850	447	1526	30	ATGATTC	Y
NM_031850	447	1526	132	ATGGGGA	Y
NM_031850	447	1526	285	ATGGCTG	Y
NM_031850	447	1526	316	ATGCCAT	Y
NM_031850	447	1526	342	ATGAAGA	N
NM_031850	447	1526	351	ATGAATC	N
NM_009585	305	1384	30	ATGATTC	Y
NM_009585	305	1384	132	ATGGGGA	Y
NM_032049	263	1342	1	ATGAAGA	Y
NM_032049	263	1342	10	ATGAATC	Y
NM_032049	263	1342	62	ATGCCAT	Y
NM_032049	263	1342	78	ATGCTCA	Y
NM_032049	263	1342	88	ATGTTCA	Y
NM_032049	263	1342	176	ATGCTGA	N
NM_000686	208	1299	144	ATGATAA	Y
NM_005161	450	1592	29	ATGTTCA	Y
NM_000687	140	1438	1	ATGAATA	Y
NM_000687	140	1438	7	ATGCAAG	Y
NM_001161766	388	1602	201	ATGCTGA	Y
NM_004847	582	980	126	ATGAGAT	Y
NM_004847	582	980	171	ATGAGGA	Y
NM_001624	488	5659	3	ATGCCAC	Y
NM_000476	154	738	20	ATGCCGC	N
NM_001005353	359	1030	164	ATGCCTG	Y
NM_001005353	359	1030	223	ATGAAGG	Y
NM_005163	555	1997	6	ATGGGTC	Y
NM_005163	555	1997	118	ATGTTGG	Y
NM_005163	555	1997	129	ATGAATG	Y
NM_005163	555	1997	133	ATGAACC	Y
NM_005163	555	1997	272	ATGTTTG	N
NM_005163	555	1997	340	ATGGGTA	Y
NM_005163	555	1997	355	ATGGACA	Y
NM_001014431	341	1783	192	ATGCGGA	Y
NM_001014432	425	1867	192	ATGCGGA	Y
NM_001626	263	1708	128	ATGGGCG	Y
NM_001626	263	1708	207	ATGTCCT	Y
NM_000031	203	1195	144	ATGCCCC	Y
NM_000031	203	1195	176	ATGCCCC	N
NM_000688	338	2260	131	ATGCCCA	Y
NM_000688	338	2260	226	ATGTGGG	Y
NM_000688	338	2260	276	ATGGATG	Y
NM_000688	338	2260	280	ATGAGTG	Y
NM_199166	189	2111	9	ATGCGCA	Y
NM_000032	139	1902	2	ATGCAGG	Y
NM_000032	139	1902	63	ATGCCAG	Y
NM_001037967	139	1791	2	ATGCAGG	Y
NM_001037967	139	1791	63	ATGCCAG	Y
NM_001037968	174	1898	2	ATGCAGG	Y
NM_001037968	174	1898	63	ATGCCAG	Y
NM_001037968	174	1898	131	ATGCCTT	N
NM_001627	541	2292	157	ATGCACA	Y
NM_000690	442	1995	28	ATGATCT	Y
NM_000690	442	1995	304	ATGGTAG	Y
NM_000691	181	1542	88	ATGGACG	Y
NM_001135167	176	1537	14	ATGGCTT	Y
NM_000692	113	1666	31	ATGTGGA	N
NM_001161473	117	1523	86	ATGGTCC	N
NM_000695	440	1597	138	ATGTCCA	N
NM_000695	440	1597	197	ATGGACC	Y
NM_001031615	284	1441	11	ATGTGGT	Y
NM_001031615	284	1441	41	ATGGACC	Y
NM_001031806	222	1748	160	ATGCTTC	N
NM_000382	222	1679	160	ATGCTTC	N
NM_005164	427	2649	29	ATGGCCT	Y
NM_005164	427	2649	93	ATGTAAT	Y
NM_005164	427	2649	177	ATGAGGG	Y
NM_005164	427	2649	241	ATGCAGC	Y
NM_005164	427	2649	325	ATGGGAC	Y
NM_005164	427	2649	376	ATGATCT	Y
NM_000034	1008	2102	79	ATGGACG	Y
NM_000034	1008	2102	356	ATGCTTG	Y
NM_000034	1008	2102	495	ATGAGGA	Y
NM_000034	1008	2102	546	ATGTGCC	Y
NM_000034	1008	2102	595	ATGGCCT	Y
NM_001127617	155	1249	37	ATGTGGG	Y
NM_004304	953	5815	28	ATGCGAT	Y
NM_004304	953	5815	163	ATGATGG	Y
NM_004304	953	5815	166	ATGGGTG	Y
NM_000698	100	2124	38	ATGCGGA	N
NM_001127501	258	1667	208	ATGCCCT	N
NM_001127501	258	1667	250	ATGTCAT	N
NM_001632	166	1773	121	ATGCCCA	N
NM_001633	264	1322	15	ATGCCTC	Y
NM_001033059	449	1009	12	ATGGCCG	Y
NM_001033059	449	1009	322	ATGGAAG	N
NM_001033059	449	1009	432	ATGGAGC	N
NM_001634	323	1327	13	ATGGCCG	Y
NM_000479	220	1902	3	ATGTTGA	Y
NM_020547	81	1802	43	ATGCTCT	N
NM_001164690	81	1517	43	ATGCTCT	N
NM_001164691	81	1517	43	ATGCTCT	N
NM_139156	433	2829	99	ATGCCCA	Y
NM_203404	209	2491	48	ATGCCCT	N
NM_004037	361	3000	23	ATGCCTG	Y
NM_004037	361	3000	165	ATGATGG	Y
NM_004037	361	3000	168	ATGGGGT	Y
NM_004037	361	3000	326	ATGGAGG	Y
NM_001025390	454	2778	313	ATGCAAA	Y
NM_001172431	473	2299	91	ATGCTTG	Y
NM_001172431	473	2299	201	ATGCCGC	N
NM_001172431	473	2299	241	ATGAGCA	Y
NM_001172431	473	2299	307	ATGCCCT	Y
NM_001172431	473	2299	438	ATGAGCA	N
NM_001025389	336	2639	75	ATGGTTA	Y
NM_001025389	336	2639	123	ATGTGTC	Y
NM_001025389	336	2639	163	ATGAAGA	Y
NM_001025389	336	2639	190	ATGCCAT	Y
NM_001172430	300	2603	58	ATGGGAA	Y
NM_001172430	300	2603	119	ATGGAAG	Y
NM_001172430	300	2603	197	ATGCTTC	Y
NM_001172430	300	2603	241	ATGCTGG	Y
NM_004038	296	1831	52	ATGTGTC	Y
NM_001008221	215	1750	95	ATGTCAG	Y
NM_001008221	215	1750	130	ATGGCTA	Y
NM_001008218	273	1808	29	ATGTGTC	Y
NM_001008219	295	1830	51	ATGTGTC	Y
NM_000699	65	1600	4	ATGTGCT	Y
NM_020978	617	2152	128	ATGTAAT	Y
NM_020978	617	2152	171	ATGTTAT	Y
NM_020978	617	2152	229	ATGATTC	Y
NM_020978	617	2152	255	ATGGTTC	Y
NM_020978	617	2152	285	ATGACCT	Y
NM_020978	617	2152	313	ATGGGCT	Y
NM_020978	617	2152	323	ATGATGT	Y
NM_020978	617	2152	326	ATGTTTT	Y
NM_020978	617	2152	403	ATGGAAC	Y
NM_020978	617	2152	427	ATGTGGA	Y
NM_020978	617	2152	438	ATGGATA	Y
NM_020978	617	2152	444	ATGGAGG	Y
NM_020978	617	2152	467	ATGTTTT	Y
NM_020978	617	2152	529	ATGACTA	Y
NM_001145	601	1044	41	ATGGTGC	N
NM_001145	601	1044	75	ATGGGTT	Y
NM_001145	601	1044	444	ATGCAAA	Y
NM_001199859	469	1962	12	ATGCATT	Y
NM_001199859	469	1962	67	ATGTGCA	Y
NM_001199859	469	1962	151	ATGTACA	Y
NM_001199859	469	1962	181	ATGCTGA	Y
NM_001199859	469	1962	226	ATGCAAT	Y
NM_001199859	469	1962	312	ATGGCTA	Y
NM_001199859	469	1962	326	ATGATTC	Y
NM_001146	469	1965	12	ATGCATT	Y
NM_001146	469	1965	67	ATGTGCA	Y
NM_001146	469	1965	151	ATGTACA	Y
NM_001146	469	1965	181	ATGCTGA	Y
NM_001146	469	1965	226	ATGCAAT	Y
NM_001146	469	1965	312	ATGGCTA	Y
NM_001146	469	1965	326	ATGATTC	Y
NM_001147	330	1820	142	ATGCCTG	Y
NM_001147	330	1820	226	ATGGCAG	Y
NM_001118887	330	1817	142	ATGCCTG	Y
NM_001118887	330	1817	226	ATGGCAG	Y
NM_001118888	330	1664	142	ATGCCTG	Y
NM_001118888	330	1664	226	ATGGCAG	Y
NM_020478	264	731	153	ATGCAAG	Y
NM_020478	264	731	194	ATGAGAG	Y
NM_020480	264	593	153	ATGCAAG	Y
NM_020480	264	593	194	ATGAGAG	Y
NM_001142445	264	734	153	ATGCAAG	Y
NM_001142445	264	734	194	ATGAGAG	Y
NM_001148	101	11974	67	ATGGCAG	N
NM_020977	101	5719	67	ATGGCAG	N
NM_001127493	222	5813	20	ATGGATT	Y
NM_001127493	222	5813	43	ATGGGAA	Y
NM_001127493	222	5813	190	ATGAAAA	N
NM_001127493	222	5813	202	ATGAAGA	N
NM_020987	193	13326	103	ATGCTGC	Y
NM_020987	193	13326	186	ATGCATT	N
NM_001149	622	3627	9	ATGCCAC	Y
NM_001149	622	3627	49	ATGTTTT	Y
NM_001149	622	3627	116	ATGTAGC	Y
NM_001149	622	3627	141	ATGAAGG	Y
NM_001149	622	3627	255	ATGTCAC	Y
NM_001149	622	3627	326	ATGTCTG	Y
NM_001149	622	3627	437	ATGTATA	Y
NM_001149	622	3627	473	ATGCTGA	Y
NM_001136015	161	1180	52	ATGTTTG	Y
NM_001136015	161	1180	72	ATGAAGT	Y
NM_001136015	161	1180	92	ATGGATA	Y
NM_001136015	161	1180	113	ATGGGAT	Y
NM_001136015	161	1180	121	ATGTCAA	N
NM_001193544	202	2127	149	ATGACTT	N
NM_001193544	202	2127	179	ATGCCGA	N
NM_145869	484	2001	406	ATGGCAG	Y
NM_145869	484	2001	421	ATGCGGG	Y
NM_004306	74	1024	39	ATGAAAT	N
NM_001003954	74	1147	39	ATGAAAT	N
NM_001637	402	2129	41	ATGCACA	Y
NM_001637	402	2129	218	ATGTGTG	Y
NM_001637	402	2129	259	ATGTGAG	Y
NM_001177506	402	2468	41	ATGCACA	Y
NM_001177506	402	2468	218	ATGTGTG	Y
NM_001177506	402	2468	259	ATGTGAG	Y
NM_001177507	402	2033	41	ATGCACA	Y
NM_001177507	402	2033	218	ATGTGTG	Y
NM_001177507	402	2033	259	ATGTGAG	Y
NM_013229	578	4291	399	ATGTGGC	Y
NM_013229	578	4291	540	ATGGTTG	N
NM_181868	578	4195	399	ATGTGGC	Y
NM_181868	578	4195	540	ATGGTTG	N
NM_001160	578	4162	399	ATGTGGC	Y
NM_001160	578	4162	540	ATGGTTG	N
NM_181869	578	1594	399	ATGTGGC	Y
NM_181869	578	1594	540	ATGGTTG	N
NM_181861	578	4324	399	ATGTGGC	Y
NM_181861	578	4324	540	ATGGTTG	N
NM_147172	288	731	7	ATGGGCC	Y
NM_147172	288	731	105	ATGGGGT	Y
NM_147172	288	731	132	ATGGGTG	Y
NM_147172	288	731	177	ATGCCAG	Y
NM_147173	246	689	7	ATGGGCC	Y
NM_147173	246	689	135	ATGCCAG	Y
NM_001161	359	802	7	ATGGGCC	Y
NM_001161	359	802	102	ATGGGAT	Y
NM_001161	359	802	146	ATGAGAT	Y
NM_001161	359	802	176	ATGGGGT	Y
NM_001161	359	802	203	ATGGGTG	Y
NM_001161	359	802	248	ATGCCAG	Y
NM_001163	277	2790	92	ATGGTGG	Y
NM_001163	277	2790	222	ATGAGAG	Y
NM_005503	208	2457	184	ATGATGG	Y
NM_005503	208	2457	187	ATGGCTG	Y
NM_001130414	208	2421	184	ATGATGG	Y
NM_001130414	208	2421	187	ATGGCTG	Y
NM_001164	101	2233	1	ATGTTGT	Y
NM_001164	101	2233	9	ATGGAGA	Y
NM_001166052	290	922	183	ATGTAGC	Y
NM_001166052	290	922	217	ATGTCAT	Y
NM_001166052	290	922	222	ATGTATT	N
NM_001166052	290	922	232	ATGTGAC	Y
NM_001166053	292	924	185	ATGTAGC	Y
NM_001166053	292	924	219	ATGTCAT	Y
NM_001166053	292	924	224	ATGTATT	N
NM_001166053	292	924	234	ATGTGAC	Y
NM_001166054	286	918	179	ATGTAGC	Y
NM_001166054	286	918	213	ATGTCAT	Y
NM_001166054	286	918	218	ATGTATT	N
NM_001166054	286	918	228	ATGTGAC	Y
NM_004307	631	2910	71	ATGCTCA	Y
NM_004307	631	2910	258	ATGCTGT	Y
NM_004307	631	2910	305	ATGGAAA	Y
NM_004307	631	2910	535	ATGTGTT	Y
NM_004307	631	2910	552	ATGGGCT	Y
NM_001166050	631	2907	71	ATGCTCA	Y
NM_001166050	631	2907	258	ATGCTGT	Y
NM_001166050	631	2907	305	ATGGAAA	Y
NM_001166050	631	2907	535	ATGTGTT	Y
NM_001166050	631	2907	552	ATGGGCT	Y
NM_173075	631	2841	71	ATGCTCA	Y
NM_173075	631	2841	258	ATGCTGT	Y
NM_173075	631	2841	305	ATGGAAA	Y
NM_173075	631	2841	535	ATGTGTT	Y
NM_173075	631	2841	552	ATGGGCT	Y
NM_001166051	296	928	189	ATGTAGC	Y
NM_001166051	296	928	223	ATGTCAT	Y
NM_001166051	296	928	228	ATGTATT	N
NM_001166051	296	928	238	ATGTGAC	Y
NM_001127510	194	8725	39	ATGGAGG	Y
NM_001127510	194	8725	63	ATGGGGA	Y
NM_001127510	194	8725	73	ATGCATT	Y
NM_001127510	194	8725	116	ATGGCTG	Y
NM_001127510	194	8725	123	ATGTGAA	Y
NM_001127510	194	8725	153	ATGAGAG	N
NM_000038	86	8617	39	ATGGAGG	N
NM_000038	86	8617	63	ATGGGGT	N
NM_001127511	214	8691	22	ATGGCGG	Y
NM_001127511	214	8691	133	ATGCTGT	Y
NM_001639	97	768	5	ATGAATA	Y
NM_000658	417	1463	6	ATGCCAT	Y
NM_000658	417	1463	11	ATGCTCA	Y
NM_000658	417	1463	33	ATGGTTT	Y
NM_000658	417	1463	44	ATGGGGT	Y
NM_000658	417	1463	204	ATGAGTG	N
NM_001166	1400	3256	3	ATGGGGC	Y
NM_001166	1400	3256	205	ATGGAGA	Y
NM_001166	1400	3256	248	ATGGAGT	Y
NM_001166	1400	3256	267	ATGAATT	Y
NM_001166	1400	3256	337	ATGCTAA	Y
NM_001166	1400	3256	431	ATGTTTA	Y
NM_001166	1400	3256	442	ATGACTG	Y
NM_001166	1400	3256	474	ATGATGA	Y
NM_001166	1400	3256	477	ATGAACA	Y
NM_001166	1400	3256	501	ATGCAGT	Y
NM_001166	1400	3256	533	ATGGCTA	Y
NM_001166	1400	3256	549	ATGGAGA	Y
NM_001166	1400	3256	614	ATGATGC	Y
NM_001166	1400	3256	617	ATGCTGC	Y
NM_001166	1400	3256	629	ATGGAAA	Y
NM_001166	1400	3256	645	ATGATAT	Y
NM_001166	1400	3256	804	ATGATGA	Y
NM_001166	1400	3256	807	ATGATAA	Y
NM_001166	1400	3256	849	ATGAAGG	Y
NM_001166	1400	3256	885	ATGAGAT	Y
NM_001166	1400	3256	905	ATGTTAA	Y
NM_001166	1400	3256	1148	ATGAACA	Y
NM_001166	1400	3256	1344	ATGTGAA	Y
NM_001166	1400	3256	1359	ATGTGAA	Y
NM_001166	1400	3256	1365	ATGTTTT	Y
NM_001165	2783	4597	84	ATGCGTC	Y
NM_001165	2783	4597	182	ATGGAGA	Y
NM_001165	2783	4597	239	ATGGGTA	Y
NM_001165	2783	4597	285	ATGCTAA	Y
NM_001165	2783	4597	302	ATGATCG	Y
NM_001165	2783	4597	330	ATGAGTT	Y
NM_001165	2783	4597	452	ATGTAGA	Y
NM_001165	2783	4597	495	ATGAGTG	Y
NM_001165	2783	4597	555	ATGCAGA	Y
NM_001165	2783	4597	561	ATGAAAG	Y
NM_001165	2783	4597	629	ATGTGCA	Y
NM_001165	2783	4597	663	ATGTGAT	Y
NM_001165	2783	4597	668	ATGATTG	Y
NM_001165	2783	4597	739	ATGGGCT	Y
NM_001165	2783	4597	759	ATGATGA	Y
NM_001165	2783	4597	762	ATGAGGA	Y
NM_001165	2783	4597	768	ATGAGAA	Y
NM_001165	2783	4597	774	ATGATGG	Y
NM_001165	2783	4597	777	ATGGTTG	Y
NM_001165	2783	4597	802	ATGAAGA	Y
NM_001165	2783	4597	837	ATGAATA	Y
NM_001165	2783	4597	864	ATGTGTA	Y
NM_001165	2783	4597	944	ATGAGAT	Y
NM_001165	2783	4597	949	ATGTGAT	Y
NM_001165	2783	4597	954	ATGTTTC	Y
NM_001165	2783	4597	1032	ATGCTTG	Y
NM_001165	2783	4597	1136	ATGGCTA	Y
NM_001165	2783	4597	1194	ATGGTAA	Y
NM_001165	2783	4597	1220	ATGATAA	Y
NM_001165	2783	4597	1242	ATGCTAT	Y
NM_001165	2783	4597	1251	ATGAAAT	Y
NM_001165	2783	4597	1281	ATGCAAT	Y
NM_001165	2783	4597	1312	ATGGCAT	Y
NM_001165	2783	4597	1371	ATGTTGG	Y
NM_001165	2783	4597	1412	ATGTTTT	Y
NM_001165	2783	4597	1448	ATGTTAG	Y
NM_001165	2783	4597	1547	ATGAAAT	Y
NM_001165	2783	4597	1561	ATGATTC	Y
NM_001165	2783	4597	1598	ATGAAGT	Y
NM_001165	2783	4597	1684	ATGTTCT	Y
NM_001165	2783	4597	1744	ATGAAAC	Y
NM_001165	2783	4597	1768	ATGAACA	Y
NM_001165	2783	4597	1866	ATGATCT	Y
NM_001165	2783	4597	1873	ATGGGAA	Y
NM_001165	2783	4597	1919	ATGTGTT	Y
NM_001165	2783	4597	2017	ATGACTA	Y
NM_001165	2783	4597	2068	ATGTCTT	Y
NM_001165	2783	4597	2138	ATGATGT	Y
NM_001165	2783	4597	2141	ATGTCAT	Y
NM_001165	2783	4597	2153	ATGAAAT	Y
NM_001165	2783	4597	2210	ATGGTAA	Y
NM_001165	2783	4597	2216	ATGTATT	Y
NM_001165	2783	4597	2352	ATGAAAA	Y
NM_001165	2783	4597	2367	ATGAGTC	Y
NM_001165	2783	4597	2400	ATGCCAC	Y
NM_001165	2783	4597	2450	ATGCCTG	Y
NM_001165	2783	4597	2464	ATGGCAT	Y
NM_001165	2783	4597	2475	ATGGCTT	Y
NM_001165	2783	4597	2542	ATGTTTA	Y
NM_001165	2783	4597	2555	ATGTATA	Y
NM_001165	2783	4597	2602	ATGTATC	Y
NM_001165	2783	4597	2630	ATGTTGA	Y
NM_001165	2783	4597	2645	ATGCATA	Y
NM_001165	2783	4597	2723	ATGCACA	Y
NM_182962	223	2037	84	ATGCGTC	Y
NM_001168	122	550	51	ATGCCCC	N
NM_001012270	122	535	51	ATGCCCC	N
NM_001012271	122	619	51	ATGCCCC	N
NM_001642	158	2449	20	ATGAAGT	Y
NM_001642	158	2449	76	ATGCTTC	Y
NM_001142277	158	2245	20	ATGAAGT	Y
NM_001142277	158	2245	76	ATGCTTC	Y
NM_001142278	158	1726	20	ATGAAGT	Y
NM_001142278	158	1726	76	ATGCTTC	Y
NM_001142276	158	2413	20	ATGAAGT	Y
NM_001142276	158	2413	76	ATGCTTC	Y
NM_001169	83	868	61	ATGTTTG	N
NM_001647	363	932	112	ATGGACA	Y
NM_001647	363	932	179	ATGGGGG	N
NM_001647	363	932	199	ATGCATG	Y
NM_001647	363	932	203	ATGAAAA	N
NM_152871	347	1291	33	ATGGAGC	Y
NM_000043	347	1354	33	ATGGAGC	Y
NM_152872	347	1009	33	ATGGAGC	Y
NM_000639	158	1003	19	ATGGAAA	Y
NM_001649	91	4941	56	ATGGGCG	Y
NM_001185061	119	775	97	ATGCAGT	N
NM_001185061	119	775	109	ATGGGGT	N
NM_001650	64	1035	35	ATGAGAG	N
NM_001651	523	1320	109	ATGCGCA	N
NM_001652	338	1186	84	ATGAGCA	N
NM_001652	338	1186	117	ATGCATA	N
NM_001170	173	1201	88	ATGCGCT	Y
NM_020980	358	1245	77	ATGATTA	Y
NM_020980	358	1245	164	ATGACAG	Y
NM_000044	1116	3878	677	ATGAAAA	Y
NM_001011645	163	1329	53	ATGCAAA	Y
NM_001011645	163	1329	59	ATGCCTG	Y
NM_001011645	163	1329	125	ATGCAGA	N
NM_001654	195	2015	103	ATGGAGA	Y
NM_001654	195	2015	143	ATGGCAC	Y
NM_001024228	241	786	159	ATGTAGG	Y
NM_001024227	263	808	159	ATGTAGG	Y
NM_001660	349	891	22	ATGGGGC	Y
NM_001663	622	1149	169	ATGACCT	Y
NM_001663	622	1149	447	ATGCCCG	Y
NM_001663	622	1149	593	ATGCCCC	N
NM_001664	277	858	5	ATGAGCT	Y
NM_004040	393	983	38	ATGCTCA	Y
NM_004040	393	983	202	ATGCCCC	Y
NM_001030055	316	4824	78	ATGTCGC	Y
NM_001030055	316	4824	152	ATGATCC	Y
NM_001030055	316	4824	161	ATGATCT	Y
NM_001030055	316	4824	173	ATGTTTC	Y
NM_001030055	316	4824	189	ATGAGGG	Y
NM_001030055	316	4824	246	ATGATTT	Y
NM_001030055	316	4824	263	ATGAGAA	N
NM_001030055	316	4824	288	ATGAATG	Y
NM_001030055	316	4824	292	ATGTAGA	Y
NM_001030055	316	4824	302	ATGAGAA	N
NM_001173	316	4821	78	ATGTCGC	Y
NM_001173	316	4821	152	ATGATCC	Y
NM_001173	316	4821	161	ATGATCT	Y
NM_001173	316	4821	173	ATGTTTC	Y
NM_001173	316	4821	189	ATGAGGG	Y
NM_001173	316	4821	246	ATGATTT	Y
NM_001173	316	4821	263	ATGAGAA	N
NM_001173	316	4821	288	ATGAATG	Y
NM_001173	316	4821	292	ATGTAGA	Y
NM_001173	316	4821	302	ATGAGAA	N
NM_006125	874	3171	671	ATGGATC	Y
NM_013427	874	3798	671	ATGGATC	Y
NM_013423	312	2627	36	ATGATCC	Y
NM_013423	312	2627	44	ATGAAAA	Y
NM_013423	312	2627	127	ATGCCAG	Y
NM_013423	312	2627	159	ATGATCT	Y
NM_013423	312	2627	177	ATGCATT	Y
NM_013423	312	2627	287	ATGGGGT	Y
NM_004310	725	1300	8	ATGGAGA	Y
NM_004310	725	1300	54	ATGAAAC	Y
NM_004310	725	1300	269	ATGAGGA	Y
NM_004310	725	1300	403	ATGGCTA	Y
NM_004310	725	1300	560	ATGGGCA	Y
NM_004310	725	1300	645	ATGGCGT	Y
NM_001667	96	650	5	ATGCCGT	N
NM_001199745	96	569	5	ATGCCGT	N
NM_178427	202	2526	35	ATGCTGG	N
NM_001668	202	2571	35	ATGCTGG	N
NM_001197325	202	2523	35	ATGCTGG	N
NM_001178	409	2286	196	ATGTGGA	Y
NM_001178	409	2286	226	ATGTCAT	Y
NM_001178	409	2286	317	ATGAAAA	Y
NM_001030272	354	2231	196	ATGTGGA	Y
NM_001030272	354	2231	262	ATGAAAA	Y
NM_001030273	554	2302	196	ATGTGGA	Y
NM_001030273	554	2302	262	ATGAAAA	Y
NM_001030273	554	2302	354	ATGGCAG	Y
NM_001030273	554	2302	369	ATGGACA	Y
NM_001030273	554	2302	399	ATGTCCC	Y
NM_001030273	554	2302	520	ATGGCTG	N
NM_001030273	554	2302	535	ATGCCCA	N
NM_001030273	554	2302	549	ATGCTAT	N
NM_004312	69	1235	14	ATGTGAA	Y
NM_000046	1287	2888	13	ATGATTT	Y
NM_000046	1287	2888	109	ATGCAAG	Y
NM_000046	1287	2888	284	ATGGTCT	Y
NM_000046	1287	2888	298	ATGCAAA	Y
NM_000046	1287	2888	367	ATGGCAA	Y
NM_000046	1287	2888	541	ATGAGCT	Y
NM_000046	1287	2888	557	ATGACCA	Y
NM_000046	1287	2888	680	ATGGGTG	Y
NM_000046	1287	2888	701	ATGAATG	Y
NM_000046	1287	2888	705	ATGTGAA	Y
NM_000046	1287	2888	779	ATGACTT	Y
NM_000046	1287	2888	800	ATGGTTC	Y
NM_000046	1287	2888	850	ATGAAAA	Y
NM_000046	1287	2888	873	ATGTCTA	Y
NM_000046	1287	2888	926	ATGCTTT	Y
NM_000351	246	1997	126	ATGGGAA	Y
NM_000351	246	1997	134	ATGCTTA	Y
NM_000351	246	1997	166	ATGAACA	Y
NM_000351	246	1997	177	ATGAACA	Y
NM_000047	251	2020	35	ATGCTGC	Y
NM_000047	251	2020	43	ATGTGGG	Y
NM_001201539	222	1994	21	ATGTTGA	Y
NM_004314	102	1085	5	ATGGTGG	Y
NM_004314	102	1085	50	ATGAGGA	N
NM_021071	367	1311	273	ATGAGAC	Y
NM_021071	367	1311	323	ATGAAGC	N
NM_001670	271	3159	230	ATGCTGA	N
NM_004315	198	1433	80	ATGGCAC	Y
NM_177924	313	1500	38	ATGGATC	Y
NM_177924	313	1500	197	ATGGTGC	N
NM_001127505	198	1367	80	ATGGCAC	Y
NM_005170	621	1202	188	ATGGGCT	Y
NM_005170	621	1202	203	ATGCGCA	Y
NM_005170	621	1202	228	ATGTGAT	Y
NM_005170	621	1202	610	ATGCAGG	N
NM_001671	401	1276	35	ATGTGTG	Y
NM_001671	401	1276	171	ATGCCAC	Y
NM_001671	401	1276	240	ATGGACC	Y
NM_001197216	401	1159	35	ATGTGTG	Y
NM_001197216	401	1159	171	ATGCCAC	Y
NM_001197216	401	1159	240	ATGGACC	Y
NM_001024943	236	1630	30	ATGGGCG	N
NM_001024944	236	1570	30	ATGGGCG	N
NM_001024946	236	1552	30	ATGGGCG	N
NM_001673	252	1937	66	ATGATGA	Y
NM_001673	252	1937	69	ATGAAAC	Y
NM_001178075	241	1863	66	ATGATGA	Y
NM_001178075	241	1863	69	ATGAAAC	Y
NM_183356	530	2215	66	ATGATGA	Y
NM_183356	530	2215	69	ATGAAAC	Y
NM_001178076	193	1629	66	ATGATGA	Y
NM_001178076	193	1629	69	ATGAAAC	Y
NM_133436	507	2192	130	ATGTTAT	Y
NM_133436	507	2192	137	ATGTGTA	Y
NM_133436	507	2192	156	ATGTGGC	Y
NM_001128085	92	1033	4	ATGCTCT	Y
NM_020164	162	839	65	ATGCAGT	Y
NM_020164	162	839	143	ATGGATT	Y
NM_001164751	162	1058	65	ATGCAGT	Y
NM_001164751	162	1058	143	ATGGATT	Y
NM_032467	162	794	65	ATGCAGT	Y
NM_032467	162	794	143	ATGGATT	Y
NM_001164752	162	1001	65	ATGCAGT	Y
NM_001164752	162	1001	143	ATGGATT	Y
NM_001164753	162	932	65	ATGCAGT	Y
NM_001164753	162	932	143	ATGGATT	Y
NM_032468	162	1061	65	ATGCAGT	Y
NM_032468	162	1061	143	ATGGATT	Y
NM_001164750	162	2351	65	ATGCAGT	Y
NM_001164750	162	2351	143	ATGGATT	Y
NM_000050	357	1595	237	ATGGGCA	N
NM_054012	295	1533	237	ATGGGCA	N
NM_006885	674	11785	90	ATGTCAG	Y
NM_006885	674	11785	168	ATGTGGA	Y
NM_006885	674	11785	410	ATGAGCT	Y
NM_006885	674	11785	494	ATGCCGC	Y
NM_006885	674	11785	555	ATGGCGG	N
NM_006885	674	11785	649	ATGAAAG	N
NM_005171	309	1124	88	ATGCCGC	Y
NM_001030287	134	679	13	ATGCCTT	Y
NM_001030287	134	679	33	ATGGGAT	Y
NM_001030287	134	679	43	ATGGGAA	N
NM_001030287	134	679	51	ATGTGAC	Y
NM_001030287	134	679	85	ATGCTCT	N
NM_001040619	284	691	91	ATGCAAC	N
NM_001674	284	829	91	ATGCAAC	N
NM_001675	883	1938	23	ATGTAGT	Y
NM_001675	883	1938	85	ATGGCGT	Y
NM_001675	883	1938	184	ATGGCGT	Y
NM_001675	883	1938	483	ATGGCGG	Y
NM_001675	883	1938	695	ATGGCCG	N
NM_001675	883	1938	734	ATGAAAT	N
NM_001675	883	1938	762	ATGGGAG	Y
NM_182810	281	1336	23	ATGTAGT	Y
NM_182810	281	1336	85	ATGGCGT	Y
NM_182810	281	1336	184	ATGGCGC	N
NM_000051	386	9556	58	ATGGCGC	Y
NM_000051	386	9556	90	ATGTTTT	Y
NM_000051	386	9556	135	ATGCGCA	Y
NM_000051	386	9556	141	ATGGGCA	Y
NM_000051	386	9556	362	ATGTGTG	Y
NM_012102	811	5511	230	ATGATCC	Y
NM_012102	811	5511	459	ATGGTGT	Y
NM_012102	811	5511	507	ATGTGCG	Y
NM_012102	811	5511	584	ATGGTGT	Y
NM_012102	811	5511	630	ATGGAAG	Y
NM_001042681	626	5326	230	ATGATCC	Y
NM_001042681	626	5326	459	ATGGTGT	Y
NM_001042682	587	3625	396	ATGACTT	Y
NM_001160234	266	3244	4	ATGTAAT	Y
NM_001160234	266	3244	12	ATGTCTT	Y
NM_001160234	266	3244	63	ATGTATT	Y
NM_001160234	266	3244	92	ATGAAAT	Y
NM_001160234	266	3244	97	ATGAGGT	Y
NM_001160234	266	3244	147	ATGTAGA	Y
NM_001160234	266	3244	201	ATGAGCC	N
NM_001135765	564	3611	16	ATGCTAT	Y
NM_170665	564	3692	16	ATGCTAT	Y
NM_001681	564	3557	16	ATGCTAT	Y
NM_174954	152	3286	39	ATGGCCT	Y
NM_174957	152	3148	39	ATGGCCT	Y
NM_005173	152	3151	39	ATGGCCT	Y
NM_174955	152	3283	39	ATGGCCT	Y
NM_174958	152	3241	39	ATGGCCT	Y
NM_174953	152	3310	39	ATGGCCT	Y
NM_174956	152	3241	39	ATGGCCT	Y
NM_001001323	182	3712	30	ATGTTGC	Y
NM_001001323	182	3712	42	ATGCTGC	Y
NM_001001323	182	3712	65	ATGAGTG	Y
NM_001682	182	3844	30	ATGTTGC	Y
NM_001682	182	3844	42	ATGCTGC	Y
NM_001682	182	3844	65	ATGAGTG	Y
NM_001683	440	4036	139	ATGTAGA	Y
NM_001683	440	4036	145	ATGCCAG	Y
NM_001683	440	4036	166	ATGGGCC	Y
NM_001683	440	4036	180	ATGGAGA	Y
NM_001001331	440	4171	139	ATGTAGA	Y
NM_001001331	440	4171	145	ATGCCAG	Y
NM_001001331	440	4171	166	ATGGGCC	Y
NM_001001331	440	4171	180	ATGGAGA	Y
NM_001684	885	4502	54	ATGACAA	Y
NM_001684	885	4502	362	ATGGAAA	Y
NM_001684	885	4502	513	ATGGTAA	Y
NM_001684	885	4502	521	ATGCACA	Y
NM_001001396	885	4397	54	ATGACAA	Y
NM_001001396	885	4397	362	ATGGAAA	Y
NM_001001396	885	4397	513	ATGGTAA	Y
NM_001001396	885	4397	521	ATGCACA	Y
NM_001686	106	1695	11	ATGGACC	Y
NM_001001973	79	975	30	ATGCGCG	N
NM_005174	79	972	30	ATGCGCG	N
NM_001688	422	1192	195	ATGGCTC	Y
NM_001688	422	1192	228	ATGCGAT	Y
NM_001002031	537	1010	70	ATGCTGC	Y
NM_001002031	537	1010	84	ATGGTTT	Y
NM_001002031	537	1010	100	ATGGAAA	Y
NM_001002031	537	1010	179	ATGGAGC	Y
NM_001002031	537	1010	203	ATGCCAG	Y
NM_001002031	537	1010	290	ATGTTAA	Y
NM_001002031	537	1010	345	ATGCTCG	Y
NM_001685	674	1000	485	ATGCGTA	Y
NM_001685	674	1000	547	ATGGCGG	Y
NM_001003701	700	1050	485	ATGCGTA	Y
NM_001003701	700	1050	547	ATGGCGG	Y
NM_001003703	810	1136	485	ATGCGTA	Y
NM_001003703	810	1136	547	ATGGCGG	Y
NM_001003703	810	1136	700	ATGCATT	Y
NM_001003703	810	1136	710	ATGGCGG	N
NM_001694	235	702	56	ATGTGAC	Y
NM_001695	246	1394	121	ATGGATC	Y
NM_001039366	188	802	26	ATGAGGA	Y
NM_001039366	188	802	32	ATGAACT	Y
NM_001039367	188	778	26	ATGAGGA	Y
NM_001039367	188	778	32	ATGAACT	Y
NM_001696	188	868	26	ATGAGGA	Y
NM_001696	188	868	32	ATGAACT	Y
NM_001039457	204	680	112	ATGACGG	Y
NM_138282	259	492	116	ATGAGAT	Y
NM_130463	290	646	116	ATGAGAT	Y
NM_001204078	290	526	116	ATGAGAT	Y
NM_000052	161	4663	142	ATGTAAT	Y
NM_000052	161	4663	147	ATGAGGA	N
NM_000053	158	4555	40	ATGCCCT	Y
NM_001005918	158	3934	40	ATGCCCT	Y
NM_000489	233	7711	32	ATGGCGG	Y
NM_138270	233	7597	32	ATGGCGG	Y
NM_004321	147	5219	44	ATGCCAG	Y
NM_004321	147	5219	56	ATGCGGG	Y
NM_181575	219	1451	3	ATGCCGG	Y
NM_181575	219	1451	65	ATGCTGG	Y
NM_181575	219	1451	127	ATGCCCA	N
NM_181575	219	1451	176	ATGGCGG	Y
NM_000706	1975	3231	109	ATGAACC	Y
NM_000706	1975	3231	185	ATGACCT	Y
NM_000706	1975	3231	322	ATGAACG	Y
NM_000706	1975	3231	367	ATGAATA	Y
NM_000706	1975	3231	480	ATGCTCC	Y
NM_000706	1975	3231	802	ATGGCCG	Y
NM_000706	1975	3231	843	ATGTCCC	Y
NM_000706	1975	3231	1060	ATGAGTG	Y
NM_000706	1975	3231	1103	ATGCATC	Y
NM_000706	1975	3231	1159	ATGTTTG	Y
NM_000706	1975	3231	1290	ATGCGTG	Y
NM_000706	1975	3231	1358	ATGCATG	Y
NM_000706	1975	3231	1362	ATGGTTA	Y
NM_000706	1975	3231	1433	ATGACTC	Y
NM_000706	1975	3231	1545	ATGCAGA	Y
NM_000706	1975	3231	1966	ATGGACA	N
NM_001701	211	1467	20	ATGTGAC	Y
NM_001186	116	2326	60	ATGATAA	N
NM_001186	116	2326	75	ATGCTTT	N
NM_001186	116	2326	109	ATGCAGA	N
NM_206866	244	2454	181	ATGGTTG	Y
NM_206866	244	2454	188	ATGATAA	N
NM_206866	244	2454	203	ATGCTTT	N
NM_206866	244	2454	237	ATGCAGA	N
NM_004322	337	843	196	ATGAGGG	Y
NM_001172415	433	1125	254	ATGACCG	Y
NM_001172415	433	1125	301	ATGAAGA	N
NM_001187	201	332	118	ATGGTGG	Y
NM_001187	201	332	136	ATGGCAG	Y
NM_001702	184	4938	119	ATGTCAA	N
NM_001703	355	5112	95	ATGGCAA	Y
NM_001703	355	5112	185	ATGTGAC	Y
NM_001703	355	5112	221	ATGGCTC	Y
NM_001703	355	5112	309	ATGCCTC	Y
NM_001703	355	5112	339	ATGGAGA	N
NM_001704	449	5017	99	ATGTATG	Y
NM_001704	449	5017	103	ATGCATT	Y
NM_001704	449	5017	151	ATGGGCA	Y
NM_001704	449	5017	439	ATGACAT	Y
NM_001188	301	936	74	ATGATCA	Y
NM_001188	301	936	136	ATGCCGG	Y
NM_001188	301	936	145	ATGCACT	Y
NM_001178091	528	1577	27	ATGACGG	Y
NM_001178091	528	1577	35	ATGGCAA	Y
NM_001178091	528	1577	95	ATGTTAC	Y
NM_001178091	528	1577	313	ATGCAAT	N
NM_001178094	424	1581	6	ATGCTGC	Y
NM_001178094	424	1581	42	ATGGTTC	Y
NM_001178094	424	1581	142	ATGGCTT	Y
NM_001178092	528	1505	27	ATGACGG	Y
NM_001178092	528	1505	35	ATGGCAA	Y
NM_001178092	528	1505	95	ATGTTAC	Y
NM_001178092	528	1505	313	ATGCAAT	N
NM_005504	528	1688	27	ATGACGG	Y
NM_005504	528	1688	35	ATGGCAA	Y
NM_005504	528	1688	95	ATGTTAC	Y
NM_005504	528	1688	313	ATGCAAT	N
NM_000055	161	1969	38	ATGTCAG	N
NM_000055	161	1969	104	ATGATTT	N
NM_000633	494	1213	125	ATGGGAT	Y
NM_000633	494	1213	141	ATGCATT	Y
NM_000633	494	1213	186	ATGCTGT	Y
NM_000633	494	1213	263	ATGAAAT	Y
NM_000633	494	1213	311	ATGCCAA	Y
NM_000633	494	1213	375	ATGCAAA	Y
NM_000657	494	1111	125	ATGGGAT	Y
NM_000657	494	1111	141	ATGCATT	Y
NM_000657	494	1111	186	ATGCTGT	Y
NM_000657	494	1111	263	ATGAAAT	Y
NM_000657	494	1111	311	ATGCCAA	Y
NM_000657	494	1111	375	ATGCAAA	Y
NM_004049	183	710	45	ATGCAAA	Y
NM_004049	183	710	72	ATGTATC	Y
NM_004049	183	710	82	ATGTGTC	Y
NM_001114735	183	674	45	ATGCAAA	Y
NM_001114735	183	674	72	ATGTATC	Y
NM_001114735	183	674	82	ATGTGTC	Y
NM_138578	367	1068	84	ATGATCC	Y
NM_138578	367	1068	335	ATGGACT	Y
NM_001191	367	879	84	ATGATCC	Y
NM_001191	367	879	335	ATGGACT	Y
NM_004050	230	811	155	ATGAAAG	Y
NM_001199839	185	766	110	ATGAAAG	Y
NM_001130845	458	2578	69	ATGAAGG	Y
NM_001130845	458	2578	112	ATGTGTC	Y
NM_001130845	458	2578	290	ATGCACA	Y
NM_001130845	458	2578	314	ATGGGAT	Y
NM_001130845	458	2578	351	ATGTCAG	Y
NM_001706	366	2486	88	ATGAGGA	Y
NM_001706	366	2486	104	ATGCCGG	Y
NM_001706	366	2486	283	ATGCAAG	Y
NM_004326	741	5021	6	ATGTGTG	Y
NM_004326	741	5021	26	ATGAATG	Y
NM_004326	741	5021	30	ATGCCTG	Y
NM_004326	741	5021	140	ATGTTGT	Y
NM_004326	741	5021	232	ATGATTC	Y
NM_004326	741	5021	270	ATGTGGG	Y
NM_004326	741	5021	364	ATGTAGA	Y
NM_004326	741	5021	447	ATGAGCA	Y
NM_004326	741	5021	483	ATGCCCT	Y
NM_004326	741	5021	494	ATGCGAG	Y
NM_004326	741	5021	537	ATGCTGG	Y
NM_001192	219	773	29	ATGTGGT	Y
NM_021574	597	4280	21	ATGGGGG	Y
NM_021574	597	4280	494	ATGGGGG	Y
NM_004327	597	4412	21	ATGGGGG	Y
NM_004327	597	4412	494	ATGGGGG	Y
NM_004328	347	1606	105	ATGTGAC	Y
NM_004328	347	1606	133	ATGGGCA	Y
NM_004328	347	1606	158	ATGAGGG	Y
NM_004328	347	1606	200	ATGAGCA	Y
NM_004328	347	1606	291	ATGAAAG	N
NM_203314	403	1434	242	ATGCAGA	Y
NM_203314	403	1434	299	ATGGAGG	Y
NM_203314	403	1434	352	ATGTCCT	Y
NM_203315	187	1218	111	ATGCTGA	N
NM_000623	197	1372	23	ATGAGCT	Y
NM_000623	197	1372	142	ATGCCGC	N
NM_170731	645	1412	420	ATGCCAG	Y
NM_170731	645	1412	553	ATGATGA	Y
NM_170731	645	1412	556	ATGACTT	Y
NM_170732	456	1199	379	ATGCAAG	Y
NM_170733	359	1102	64	ATGAAAT	Y
NM_170733	359	1102	94	ATGGAGC	Y
NM_170733	359	1102	110	ATGGGGT	Y
NM_170733	359	1102	135	ATGCAAT	Y
NM_170733	359	1102	307	ATGGTTA	Y
NM_001709	347	1090	12	ATGTCTG	Y
NM_001709	347	1090	189	ATGAGAC	Y
NM_001709	347	1090	279	ATGTGAC	Y
NM_170734	262	1050	58	ATGTAGC	Y
NM_170734	262	1050	222	ATGTACG	Y
NM_170735	1086	1829	67	ATGTGTG	Y
NM_170735	1086	1829	142	ATGGGAG	Y
NM_170735	1086	1829	158	ATGGACT	Y
NM_170735	1086	1829	168	ATGTCTT	Y
NM_170735	1086	1829	179	ATGCTGA	Y
NM_170735	1086	1829	223	ATGACAT	Y
NM_170735	1086	1829	258	ATGAACA	Y
NM_170735	1086	1829	264	ATGTCAA	Y
NM_170735	1086	1829	274	ATGATTT	Y
NM_170735	1086	1829	381	ATGACAT	Y
NM_170735	1086	1829	402	ATGGCCT	Y
NM_170735	1086	1829	434	ATGGCTC	Y
NM_170735	1086	1829	442	ATGAAAT	Y
NM_170735	1086	1829	555	ATGCCTA	Y
NM_170735	1086	1829	638	ATGTTGC	Y
NM_170735	1086	1829	700	ATGATTT	Y
NM_170735	1086	1829	725	ATGAGCA	Y
NM_170735	1086	1829	836	ATGCTAG	Y
NM_170735	1086	1829	863	ATGTCTC	Y
NM_170735	1086	1829	971	ATGGCCT	Y
NM_170735	1086	1829	992	ATGGGCC	Y
NM_170735	1086	1829	1001	ATGGCAT	Y
NM_001143807	259	1002	81	ATGCTTC	N
NM_001143807	259	1002	220	ATGCCTC	Y
NM_001143808	95	838	18	ATGCTCT	Y
NM_001143810	142	1131	18	ATGCTCT	Y
NM_001143810	142	1131	114	ATGCAAA	Y
NM_001143811	505	1248	18	ATGCTCT	Y
NM_001143811	505	1248	114	ATGCAAA	Y
NM_001143811	505	1248	142	ATGTGTG	Y
NM_001143811	505	1248	167	ATGAGTG	Y
NM_001143811	505	1248	203	ATGCTGA	Y
NM_001143811	505	1248	240	ATGTTTT	Y
NM_001143811	505	1248	270	ATGGCAT	Y
NM_001143811	505	1248	275	ATGACTG	Y
NM_001143811	505	1248	353	ATGGTTT	Y
NM_001143811	505	1248	369	ATGGTAA	Y
NM_001143811	505	1248	398	ATGTTAT	Y
NM_001143812	247	990	201	ATGTCGC	N
NM_001143813	329	1072	12	ATGTCTG	Y
NM_001143813	329	1072	189	ATGAGAC	Y
NM_001143813	329	1072	279	ATGTGAC	Y
NM_001143814	454	1197	12	ATGTCTG	Y
NM_001143814	454	1197	189	ATGAGAC	Y
NM_001143814	454	1197	279	ATGTGAC	Y
NM_001143814	454	1197	327	ATGAGCA	Y
NM_001143816	852	1595	67	ATGTGTG	Y
NM_001143816	852	1595	142	ATGGGAG	Y
NM_001143816	852	1595	158	ATGGACT	Y
NM_001143816	852	1595	168	ATGTCTT	Y
NM_001143816	852	1595	179	ATGCTGA	Y
NM_001143816	852	1595	223	ATGACAT	Y
NM_001143816	852	1595	258	ATGAACA	Y
NM_001143816	852	1595	264	ATGTCAA	Y
NM_001143816	852	1595	274	ATGATTT	Y
NM_001143816	852	1595	381	ATGACAT	Y
NM_001143816	852	1595	402	ATGGCCT	Y
NM_001143816	852	1595	434	ATGGCTC	Y
NM_001143816	852	1595	442	ATGAAAT	Y
NM_001143816	852	1595	555	ATGCCTA	Y
NM_001143816	852	1595	638	ATGTTGC	Y
NM_001143816	852	1595	700	ATGATTT	Y
NM_001143816	852	1595	725	ATGAGCA	Y
NM_001710	279	2573	57	ATGTTCC	Y
NM_001710	279	2573	73	ATGTGGG	Y
NM_001710	279	2573	161	ATGTGAC	Y
NM_001161705	272	1894	9	ATGCTGG	Y
NM_001161705	272	1894	215	ATGTGAG	Y
NM_001161705	272	1894	226	ATGGATT	N
NM_001161705	272	1894	258	ATGCTGG	N
NM_197966	325	1050	183	ATGATGT	Y
NM_197966	325	1050	186	ATGTGCG	Y
NM_197966	325	1050	233	ATGACCC	N
NM_197967	389	688	138	ATGAGTG	Y
NM_197967	389	688	264	ATGAGCT	Y
NM_197967	389	688	279	ATGGCAA	Y
NM_182907	147	2222	85	ATGAACA	N
NM_182907	147	2222	125	ATGAAAA	Y
NM_001198	235	2712	198	ATGTGGA	Y
NM_001198	235	2712	215	ATGAACG	N
NM_001715	582	2099	8	ATGGCAC	Y
NM_001715	582	2099	15	ATGGCAG	Y
NM_001715	582	2099	38	ATGAGAT	Y
NM_001715	582	2099	93	ATGGAGG	Y
NM_001715	582	2099	236	ATGGTCC	Y
NM_001715	582	2099	427	ATGAAAA	Y
NM_001715	582	2099	443	ATGAGAA	Y
NM_001715	582	2099	481	ATGGTGT	Y
NM_001715	582	2099	551	ATGGTGA	Y
NM_032966	289	1272	13	ATGCGGT	Y
NM_032966	289	1272	111	ATGTAGG	Y
NM_005180	507	1487	10	ATGAAAT	Y
NM_005180	507	1487	26	ATGAGAG	Y
NM_005180	507	1487	53	ATGGGGA	Y
NM_005180	507	1487	59	ATGTGGG	Y
NM_005180	507	1487	309	ATGAGAC	Y
NM_005180	507	1487	389	ATGGCCG	Y
NM_001200	786	1976	95	ATGCGCC	Y
NM_001200	786	1976	152	ATGGGGG	Y
NM_001200	786	1976	181	ATGCGGG	Y
NM_001200	786	1976	251	ATGGCTG	Y
NM_001200	786	1976	267	ATGGGCC	Y
NM_001200	786	1976	714	ATGTGGA	Y
NM_001200	786	1976	731	ATGGACG	Y
NM_001202	420	1646	17	ATGCGAG	Y
NM_001202	420	1646	159	ATGGGAT	Y
NM_001202	420	1646	285	ATGGAGC	Y
NM_001202	420	1646	380	ATGGACT	N
NM_001202	420	1646	395	ATGCCTT	N
NM_130850	211	1437	17	ATGCGAG	N
NM_130850	211	1437	171	ATGGACT	N
NM_130850	211	1437	186	ATGCCTT	N
NM_130851	265	1491	130	ATGGAGC	Y
NM_130851	265	1491	225	ATGGACT	N
NM_130851	265	1491	240	ATGCCTT	N
NM_021073	713	2077	72	ATGGACT	Y
NM_021073	713	2077	169	ATGTTAA	Y
NM_021073	713	2077	395	ATGCATA	Y
NM_021073	713	2077	444	ATGCAGC	Y
NM_021073	713	2077	563	ATGTTGT	Y
NM_021073	713	2077	578	ATGTCAC	Y
NM_021073	713	2077	589	ATGAAAA	Y
NM_001718	179	1720	25	ATGAGAG	Y
NM_001719	530	1825	396	ATGTCTG	Y
NM_001720	377	1585	333	ATGCGCG	Y
NM_004329	549	2147	262	ATGCGTT	Y
NM_004329	549	2147	286	ATGAAAA	Y
NM_004329	549	2147	294	ATGCATC	Y
NM_004329	549	2147	324	ATGAGAT	Y
NM_004329	549	2147	329	ATGGAAG	Y
NM_004329	549	2147	470	ATGATAG	Y
NM_001203	275	1783	120	ATGTGAA	Y
NM_001203	275	1783	146	ATGCCTT	Y
NM_001203	275	1783	204	ATGACAA	Y
NM_001204	1149	4265	543	ATGGAGG	Y
NM_001204	1149	4265	662	ATGCGAC	Y
NM_001204	1149	4265	786	ATGTTTT	Y
NM_001204	1149	4265	884	ATGCCTT	Y
NM_001204	1149	4265	955	ATGAAGG	Y
NM_001204	1149	4265	978	ATGAAAG	Y
NM_203281	174	2201	27	ATGTAGC	Y
NM_203281	174	2201	59	ATGTGAA	Y
NM_203281	174	2201	166	ATGATAA	N
NM_001721	112	2139	7	ATGAGTG	Y
NM_001721	112	2139	14	ATGGTGC	Y
NM_001721	112	2139	74	ATGTATA	N
NM_001721	112	2139	104	ATGATAA	N
NM_001722	84	1280	2	ATGGCGG	N
NM_032515	247	885	133	ATGGAAG	Y
NM_032515	247	885	204	ATGCGGC	N
NM_023067	419	1549	196	ATGGCCA	Y
NM_001724	221	1000	61	ATGCCGG	Y
NM_001724	221	1000	76	ATGAGTC	Y
NM_001724	221	1000	160	ATGTATT	Y
NM_199186	542	1321	61	ATGCCGG	Y
NM_199186	542	1321	76	ATGAGTC	Y
NM_199186	542	1321	195	ATGAGGT	Y
NM_199186	542	1321	250	ATGCATG	Y
NM_199186	542	1321	254	ATGGTCC	Y
NM_199186	542	1321	354	ATGCCTT	Y
NM_199186	542	1321	431	ATGTTGA	Y
NM_199186	542	1321	449	ATGTTTG	Y
NM_199186	542	1321	481	ATGTATT	Y
NM_004332	50	925	16	ATGCGCA	N
NM_007297	282	5732	195	ATGGATT	Y
NM_007297	282	5732	232	ATGTCAT	Y
NM_007297	282	5732	241	ATGCTAT	Y
NM_007297	282	5732	246	ATGCAGA	Y
NM_001726	145	2988	46	ATGTTCC	Y
NM_001726	145	2988	105	ATGGACA	Y
NM_001726	145	2988	111	ATGTACT	Y
NM_207189	350	3193	153	ATGTACC	Y
NM_207189	350	3193	316	ATGTACT	Y
NM_001727	150	1349	11	ATGTCTT	Y
NM_004334	196	1152	21	ATGAGCC	Y
NM_001729	348	884	9	ATGTCCC	Y
NM_001729	348	884	27	ATGGGTG	Y
NM_000060	104	1735	13	ATGCAAA	Y
NM_001206	1295	2029	41	ATGGGGT	Y
NM_001206	1295	2029	140	ATGTGTC	Y
NM_001206	1295	2029	223	ATGCCAG	Y
NM_001206	1295	2029	374	ATGTGTC	Y
NM_001206	1295	2029	497	ATGTCAG	Y
NM_001206	1295	2029	682	ATGGGAT	Y
NM_001206	1295	2029	716	ATGCCGG	Y
NM_001206	1295	2029	841	ATGTCCT	Y
NM_001206	1295	2029	1076	ATGCTGC	Y
NM_001206	1295	2029	1111	ATGAGGG	Y
NM_001731	363	878	70	ATGCAGC	Y
NM_001731	363	878	92	ATGCTGC	Y
NM_001731	363	878	136	ATGTGAC	Y
NM_000061	194	2173	65	ATGTCTC	Y
NM_000061	194	2173	125	ATGCATC	Y
NM_001211	213	3365	206	ATGCAGG	N
NM_004053	337	1650	70	ATGAAGC	Y
NM_004053	337	1650	195	ATGGCGC	Y
NM_004053	337	1650	215	ATGCTAG	N
NM_000714	106	615	9	ATGCGGG	Y
NM_007311	176	484	9	ATGCGGG	Y
NM_201442	364	2430	24	ATGCACA	Y
NM_201442	364	2430	48	ATGAACA	Y
NM_201442	364	2430	147	ATGCCCA	Y
NM_001734	277	2343	24	ATGCACA	Y
NM_001734	277	2343	48	ATGAACA	Y
NM_001734	277	2343	147	ATGCCCA	Y
NM_001178063	69	1685	9	ATGTCCC	Y
NM_001145903	265	2127	168	ATGAAGC	Y
NM_001145903	265	2127	210	ATGACCT	Y
NM_000063	265	2523	168	ATGAAGC	Y
NM_000063	265	2523	210	ATGACCT	Y
NM_000715	195	1988	53	ATGATAA	Y
NM_001115131	266	3070	31	ATGTCTT	Y
NM_001115131	266	3070	105	ATGTTTC	Y
NM_001115131	266	3070	169	ATGAAAC	Y
NM_001115131	266	3070	200	ATGTGCT	Y
NM_001115131	266	3070	239	ATGCATA	N
NM_000065	211	3015	47	ATGACAG	Y
NM_000587	115	2646	101	ATGTTTT	N
NM_000066	68	1843	24	ATGGGTC	N
NM_004337	347	1864	14	ATGAGCA	Y
NM_004337	347	1864	77	ATGAAGA	Y
NM_004337	347	1864	91	ATGACCT	Y
NM_004337	347	1864	184	ATGCGGG	Y
NM_004337	347	1864	249	ATGCCCA	Y
NM_001737	90	1769	35	ATGCCTT	N
NM_001584	121	1005	2	ATGCACA	Y
NM_001584	121	1005	18	ATGAGTA	Y
NM_001584	121	1005	59	ATGCCTG	Y
NM_001584	121	1005	102	ATGCCTA	N
NM_001145399	464	1297	280	ATGGATC	Y
NM_001145399	464	1297	345	ATGCACA	Y
NM_001145399	464	1297	361	ATGAGTA	Y
NM_001145399	464	1297	402	ATGCCTG	Y
NM_001145399	464	1297	445	ATGCCTA	N
NM_001127392	97	3552	32	ATGCCGC	Y
NM_006133	117	3245	24	ATGGAGG	Y
NM_001214	560	913	40	ATGGTGT	Y
NM_001214	560	913	286	ATGCCGG	Y
NM_001214	560	913	299	ATGAGGG	Y
NM_001214	560	913	351	ATGTCTT	Y
NM_001214	560	913	429	ATGGTGT	Y
NM_005892	201	3503	18	ATGGGAC	Y
NM_001003674	1040	1849	60	ATGGGGA	Y
NM_001003674	1040	1849	70	ATGATGT	Y
NM_001003674	1040	1849	73	ATGTGAG	Y
NM_001003674	1040	1849	95	ATGAATG	Y
NM_001003674	1040	1849	99	ATGGGAG	Y
NM_001003674	1040	1849	236	ATGTGGA	Y
NM_001003674	1040	1849	550	ATGAGCC	Y
NM_001003674	1040	1849	761	ATGGCAG	Y
NM_001003674	1040	1849	920	ATGCCAG	Y
NM_001003674	1040	1849	980	ATGCTTT	Y
NM_001003675	1040	1795	60	ATGGGGA	Y
NM_001003675	1040	1795	70	ATGATGT	Y
NM_001003675	1040	1795	73	ATGTGAG	Y
NM_001003675	1040	1795	95	ATGAATG	Y
NM_001003675	1040	1795	99	ATGGGAG	Y
NM_001003675	1040	1795	236	ATGTGGA	Y
NM_001003675	1040	1795	550	ATGAGCC	Y
NM_001003675	1040	1795	761	ATGGCAG	Y
NM_001003675	1040	1795	920	ATGCCAG	Y
NM_001003675	1040	1795	980	ATGCTTT	Y
NM_181483	243	935	22	ATGGCAG	Y
NM_181483	243	935	167	ATGGCTG	N
NM_181483	243	935	196	ATGGGTG	N
NM_004338	243	989	22	ATGGCAG	Y
NM_004338	243	989	167	ATGGCTG	N
NM_004338	243	989	196	ATGGGTG	N
NM_181482	669	1535	357	ATGCTGG	Y
NM_181482	669	1535	427	ATGGCCT	Y
NM_181482	669	1535	537	ATGCTCC	Y
NM_181482	669	1535	566	ATGGACT	Y
NM_181482	669	1535	586	ATGGAAG	Y
NM_181481	669	1589	357	ATGCTGG	Y
NM_181481	669	1589	427	ATGGCCT	Y
NM_181481	669	1589	537	ATGCTCC	Y
NM_181481	669	1589	566	ATGGACT	Y
NM_181481	669	1589	586	ATGGAAG	Y
NM_004339	288	830	129	ATGGCGA	Y
NM_004339	288	830	175	ATGGCCC	N
NM_004928	209	979	1	ATGAGCA	N
NM_006134	179	655	151	ATGAAAA	N
NM_006134	179	655	162	ATGCTTA	Y
NM_001044370	224	1204	199	ATGCCGG	N
NM_001128830	170	955	98	ATGTGAA	Y
NM_001128830	170	955	112	ATGACTG	Y
NM_001128830	170	955	121	ATGGCAT	Y
NM_001128830	170	955	126	ATGAAAA	Y
NM_001128830	170	955	143	ATGAAAA	Y
NM_001164830	80	865	10	ATGCACA	Y
NM_001215	25	951	13	ATGTGCA	N
NM_001014435	430	1056	141	ATGTGTC	Y
NM_001014435	430	1056	419	ATGAGGC	N
NM_001217	563	1549	170	ATGCGGG	Y
NM_001217	563	1549	177	ATGGAGA	Y
NM_001217	563	1549	213	ATGAAAA	Y
NM_000068	237	7037	2	ATGTCCC	Y
NM_000068	237	7037	85	ATGGGCT	N
NM_023035	237	7775	2	ATGTCCC	Y
NM_023035	237	7775	85	ATGGGCT	N
NM_001127221	237	7022	2	ATGTCCC	Y
NM_001127221	237	7022	85	ATGGGCT	N
NM_001174080	237	7028	2	ATGTCCC	Y
NM_001174080	237	7028	85	ATGGGCT	N
NM_001127222	237	7757	2	ATGTCCC	Y
NM_001127222	237	7757	85	ATGGGCT	N
NM_000718	146	7165	124	ATGCACG	N
NM_001129833	314	6787	13	ATGGTGT	Y
NM_001129833	314	6787	62	ATGTACT	Y
NM_001129833	314	6787	73	ATGCGTT	Y
NM_001129833	314	6787	131	ATGCCAT	Y
NM_001129833	314	6787	139	ATGGGAA	Y
NM_001129836	314	6781	13	ATGGTGT	Y
NM_001129836	314	6781	62	ATGTACT	Y
NM_001129836	314	6781	73	ATGCGTT	Y
NM_001129836	314	6781	131	ATGCCAT	Y
NM_001129836	314	6781	139	ATGGGAA	Y
NM_001129839	314	6748	13	ATGGTGT	Y
NM_001129839	314	6748	62	ATGTACT	Y
NM_001129839	314	6748	73	ATGCGTT	Y
NM_001129839	314	6748	131	ATGCCAT	Y
NM_001129839	314	6748	139	ATGGGAA	Y
NM_001129842	314	6730	13	ATGGTGT	Y
NM_001129842	314	6730	62	ATGTACT	Y
NM_001129842	314	6730	73	ATGCGTT	Y
NM_001129842	314	6730	131	ATGCCAT	Y
NM_001129842	314	6730	139	ATGGGAA	Y
NM_001167623	314	6730	13	ATGGTGT	Y
NM_001167623	314	6730	62	ATGTACT	Y
NM_001167623	314	6730	73	ATGCGTT	Y
NM_001167623	314	6730	131	ATGCCAT	Y
NM_001167623	314	6730	139	ATGGGAA	Y
NM_001129834	314	6787	13	ATGGTGT	Y
NM_001129834	314	6787	62	ATGTACT	Y
NM_001129834	314	6787	73	ATGCGTT	Y
NM_001129834	314	6787	131	ATGCCAT	Y
NM_001129834	314	6787	139	ATGGGAA	Y
NM_199460	314	6979	13	ATGGTGT	Y
NM_199460	314	6979	62	ATGTACT	Y
NM_199460	314	6979	73	ATGCGTT	Y
NM_199460	314	6979	131	ATGCCAT	Y
NM_199460	314	6979	139	ATGGGAA	Y
NM_001129831	314	6814	13	ATGGTGT	Y
NM_001129831	314	6814	62	ATGTACT	Y
NM_001129831	314	6814	73	ATGCGTT	Y
NM_001129831	314	6814	131	ATGCCAT	Y
NM_001129831	314	6814	139	ATGGGAA	Y
NM_001129837	314	6754	13	ATGGTGT	Y
NM_001129837	314	6754	62	ATGTACT	Y
NM_001129837	314	6754	73	ATGCGTT	Y
NM_001129837	314	6754	131	ATGCCAT	Y
NM_001129837	314	6754	139	ATGGGAA	Y
NM_001129840	314	6730	13	ATGGTGT	Y
NM_001129840	314	6730	62	ATGTACT	Y
NM_001129840	314	6730	73	ATGCGTT	Y
NM_001129840	314	6730	131	ATGCCAT	Y
NM_001129840	314	6730	139	ATGGGAA	Y
NM_001129843	314	6730	13	ATGGTGT	Y
NM_001129843	314	6730	62	ATGTACT	Y
NM_001129843	314	6730	73	ATGCGTT	Y
NM_001129843	314	6730	131	ATGCCAT	Y
NM_001129843	314	6730	139	ATGGGAA	Y
NM_001129846	314	6697	13	ATGGTGT	Y
NM_001129846	314	6697	62	ATGTACT	Y
NM_001129846	314	6697	73	ATGCGTT	Y
NM_001129846	314	6697	131	ATGCCAT	Y
NM_001129846	314	6697	139	ATGGGAA	Y
NM_001167624	314	6835	13	ATGGTGT	Y
NM_001167624	314	6835	62	ATGTACT	Y
NM_001167624	314	6835	73	ATGCGTT	Y
NM_001167624	314	6835	131	ATGCCAT	Y
NM_001167624	314	6835	139	ATGGGAA	Y
NM_001129832	314	6790	13	ATGGTGT	Y
NM_001129832	314	6790	62	ATGTACT	Y
NM_001129832	314	6790	73	ATGCGTT	Y
NM_001129832	314	6790	131	ATGCCAT	Y
NM_001129832	314	6790	139	ATGGGAA	Y
NM_000719	314	6730	13	ATGGTGT	Y
NM_000719	314	6730	62	ATGTACT	Y
NM_000719	314	6730	73	ATGCGTT	Y
NM_000719	314	6730	131	ATGCCAT	Y
NM_000719	314	6730	139	ATGGGAA	Y
NM_001129829	314	6853	13	ATGGTGT	Y
NM_001129829	314	6853	62	ATGTACT	Y
NM_001129829	314	6853	73	ATGCGTT	Y
NM_001129829	314	6853	131	ATGCCAT	Y
NM_001129829	314	6853	139	ATGGGAA	Y
NM_001129835	314	6787	13	ATGGTGT	Y
NM_001129835	314	6787	62	ATGTACT	Y
NM_001129835	314	6787	73	ATGCGTT	Y
NM_001129835	314	6787	131	ATGCCAT	Y
NM_001129835	314	6787	139	ATGGGAA	Y
NM_001129838	314	6754	13	ATGGTGT	Y
NM_001129838	314	6754	62	ATGTACT	Y
NM_001129838	314	6754	73	ATGCGTT	Y
NM_001129838	314	6754	131	ATGCCAT	Y
NM_001129838	314	6754	139	ATGGGAA	Y
NM_001167625	314	6910	13	ATGGTGT	Y
NM_001167625	314	6910	62	ATGTACT	Y
NM_001167625	314	6910	73	ATGCGTT	Y
NM_001167625	314	6910	131	ATGCCAT	Y
NM_001167625	314	6910	139	ATGGGAA	Y
NM_001129841	314	6730	13	ATGGTGT	Y
NM_001129841	314	6730	62	ATGTACT	Y
NM_001129841	314	6730	73	ATGCGTT	Y
NM_001129841	314	6730	131	ATGCCAT	Y
NM_001129841	314	6730	139	ATGGGAA	Y
NM_001129844	314	6721	13	ATGGTGT	Y
NM_001129844	314	6721	62	ATGTACT	Y
NM_001129844	314	6721	73	ATGCGTT	Y
NM_001129844	314	6721	131	ATGCCAT	Y
NM_001129844	314	6721	139	ATGGGAA	Y
NM_001129827	314	6874	13	ATGGTGT	Y
NM_001129827	314	6874	62	ATGTACT	Y
NM_001129827	314	6874	73	ATGCGTT	Y
NM_001129827	314	6874	131	ATGCCAT	Y
NM_001129827	314	6874	139	ATGGGAA	Y
NM_001129830	314	6835	13	ATGGTGT	Y
NM_001129830	314	6835	62	ATGTACT	Y
NM_001129830	314	6835	73	ATGCGTT	Y
NM_001129830	314	6835	131	ATGCCAT	Y
NM_001129830	314	6835	139	ATGGGAA	Y
NM_000720	164	6709	154	ATGTTCG	N
NM_001128839	164	6577	154	ATGTTCG	N
NM_001128840	164	6649	154	ATGTTCG	N
NM_000721	166	6978	67	ATGCGGC	Y
NM_005183	63	5996	38	ATGGCCC	N
NM_013993	260	3001	155	ATGAGAG	Y
NM_013993	260	3001	190	ATGGGGT	Y
NM_013993	260	3001	210	ATGCCAA	N
NM_013993	260	3001	220	ATGCTGC	Y
NM_013994	43	2802	3	ATGCTGC	Y
NM_001954	334	2964	229	ATGAGAG	Y
NM_001954	334	2964	264	ATGGGGT	Y
NM_001954	334	2964	284	ATGCCAA	N
NM_001954	334	2964	294	ATGCTGC	Y
NM_001202521	43	1569	3	ATGCTGC	Y
NM_001202522	43	2346	3	ATGCTGC	Y
NM_001202523	241	2925	214	ATGGTCA	Y
NM_001202523	241	2925	233	ATGAGAG	N
NM_199247	154	1725	97	ATGCGCT	Y
NM_199248	154	1590	97	ATGCGCT	Y
NM_000723	154	1950	97	ATGCGCT	Y
NM_201572	368	2194	358	ATGGAGA	N
NM_201590	243	2063	8	ATGAGCT	Y
NM_201590	243	2063	134	ATGCTGT	Y
NM_001167945	368	2152	358	ATGGAGA	N
NM_201571	368	2266	358	ATGGAGA	N
NM_000724	616	2433	13	ATGCCCA	Y
NM_000724	616	2433	50	ATGCTGC	Y
NM_000724	616	2433	201	ATGCAAG	Y
NM_000724	616	2433	216	ATGTTTG	Y
NM_000724	616	2433	242	ATGGCTA	Y
NM_000724	616	2433	329	ATGCTAC	Y
NM_000724	616	2433	437	ATGCCTG	Y
NM_000724	616	2433	501	ATGCCTC	Y
NM_000724	616	2433	535	ATGGACC	Y
NM_201570	449	2287	31	ATGTCAC	Y
NM_201570	449	2287	128	ATGTTTA	Y
NM_201570	449	2287	140	ATGAGAT	Y
NM_201570	449	2287	145	ATGCATT	Y
NM_201570	449	2287	169	ATGCTCG	Y
NM_201570	449	2287	184	ATGCACT	Y
NM_201570	449	2287	253	ATGGGAA	Y
NM_201570	449	2287	277	ATGGGAG	Y
NM_201570	449	2287	351	ATGGATA	N
NM_000726	69	1631	51	ATGCGGC	Y
NM_001005746	73	1581	32	ATGCCGG	N
NM_001005747	259	1719	59	ATGCCAG	Y
NM_001005747	259	1719	103	ATGTGAA	Y
NM_001005747	259	1719	109	ATGAATA	Y
NM_001145798	69	1445	51	ATGCGGC	Y
NM_001164738	317	1741	33	ATGAGAG	Y
NM_001164738	317	1741	55	ATGTTTA	Y
NM_001164738	317	1741	87	ATGAAAA	Y
NM_001164738	317	1741	93	ATGGCTT	Y
NM_001164738	317	1741	110	ATGGTCA	Y
NM_001164738	317	1741	167	ATGAGTA	Y
NM_001742	284	1708	157	ATGGGCG	Y
NM_001164737	301	1827	157	ATGGGCG	Y
NM_001164737	301	1827	263	ATGATTC	N
NM_033139	222	1898	128	ATGGCCC	Y
NM_004342	467	2083	2	ATGAGTG	Y
NM_004342	467	2083	20	ATGCCTA	Y
NM_004342	467	2083	31	ATGACAG	Y
NM_004342	467	2083	114	ATGCATA	Y
NM_004342	467	2083	152	ATGTGTT	Y
NM_004342	467	2083	167	ATGGACT	Y
NM_033140	222	1820	128	ATGGCCC	Y
NM_033138	467	2848	2	ATGAGTG	Y
NM_033138	467	2848	20	ATGCCTA	Y
NM_033138	467	2848	31	ATGACAG	Y
NM_033138	467	2848	114	ATGCATA	Y
NM_033138	467	2848	152	ATGTGTT	Y
NM_033138	467	2848	167	ATGGACT	Y
NM_033157	467	2158	2	ATGAGTG	Y
NM_033157	467	2158	20	ATGCCTA	Y
NM_033157	467	2158	31	ATGACAG	Y
NM_033157	467	2158	114	ATGCATA	Y
NM_033157	467	2158	152	ATGTGTT	Y
NM_033157	467	2158	167	ATGGACT	Y
NM_001166106	333	674	161	ATGCCCT	Y
NM_001166106	333	674	206	ATGCGAC	Y
NM_001166106	333	674	292	ATGGCGA	N
NM_001166106	333	674	298	ATGGCAC	N
NM_001743	159	608	11	ATGTTCC	Y
NM_001743	159	608	27	ATGCGGC	Y
NM_001743	159	608	61	ATGAGGC	N
NM_001199671	944	1915	30	ATGAGGG	Y
NM_001199671	944	1915	180	ATGAAAG	Y
NM_001199671	944	1915	192	ATGTAAA	Y
NM_001199671	944	1915	302	ATGTGTA	Y
NM_001199671	944	1915	464	ATGCCTA	Y
NM_001199671	944	1915	478	ATGGGAA	Y
NM_001199671	944	1915	519	ATGACTA	Y
NM_001199671	944	1915	536	ATGATTT	Y
NM_001199671	944	1915	575	ATGTTGG	Y
NM_001199671	944	1915	638	ATGAACA	Y
NM_001199671	944	1915	678	ATGTCTG	Y
NM_001199671	944	1915	736	ATGATTC	Y
NM_001199671	944	1915	755	ATGTTTG	Y
NM_001199671	944	1915	777	ATGCGTA	Y
NM_001199671	944	1915	843	ATGAACT	Y
NM_001199674	180	674	30	ATGAGGG	Y
NM_001199674	180	674	142	ATGATCC	N
NM_001199674	180	674	157	ATGATGG	N
NM_001199674	180	674	160	ATGGATT	N
NM_001219	153	1100	30	ATGAGGG	Y
NM_001199672	944	1915	30	ATGAGGG	Y
NM_001199672	944	1915	180	ATGAAAG	Y
NM_001199672	944	1915	192	ATGTAAA	Y
NM_001199672	944	1915	302	ATGTGTA	Y
NM_001199672	944	1915	464	ATGCCTA	Y
NM_001199672	944	1915	478	ATGGGAA	Y
NM_001199672	944	1915	519	ATGACTA	Y
NM_001199672	944	1915	536	ATGATTT	Y
NM_001199672	944	1915	575	ATGTTGG	Y
NM_001199672	944	1915	638	ATGAACA	Y
NM_001199672	944	1915	678	ATGTCTG	Y
NM_001199672	944	1915	736	ATGATTC	Y
NM_001199672	944	1915	755	ATGTTTG	Y
NM_001199672	944	1915	777	ATGCGTA	Y
NM_001199672	944	1915	843	ATGAACT	Y
NM_001130674	153	1100	30	ATGAGGG	Y
NM_001199673	153	827	30	ATGAGGG	Y
NM_171825	216	1652	8	ATGGGGA	N
NM_171825	216	1652	20	ATGCTGA	N
NM_015981	216	1685	8	ATGGGGA	N
NM_015981	216	1685	20	ATGCTGA	N
NM_004345	141	653	41	ATGGGTG	N
NM_004345	141	653	132	ATGGGGA	N
NM_001198870	274	2256	183	ATGTCGG	N
NM_001146068	237	2105	13	ATGGCTC	Y
NM_001146068	237	2105	73	ATGTTCG	Y
NM_001146068	237	2105	83	ATGTGGA	Y
NM_001748	225	2327	12	ATGGCCT	Y
NM_173089	259	729	48	ATGACCA	Y
NM_173089	259	729	107	ATGCTGG	Y
NM_173089	259	729	159	ATGGGAG	Y
NM_173089	259	729	254	ATGACAT	N
NM_024344	307	2754	26	ATGCATG	Y
NM_024344	307	2754	30	ATGCTGC	Y
NM_024344	307	2754	103	ATGGCTT	Y
NM_024344	307	2754	134	ATGGACA	Y
NM_024344	307	2754	160	ATGGGCT	Y
NM_024344	307	2754	183	ATGTGGA	Y
NM_024344	307	2754	204	ATGACAG	Y
NM_000070	307	2772	26	ATGCATG	Y
NM_000070	307	2772	30	ATGCTGC	Y
NM_000070	307	2772	103	ATGGCTT	Y
NM_000070	307	2772	134	ATGGACA	Y
NM_000070	307	2772	160	ATGGGCT	Y
NM_000070	307	2772	183	ATGTGGA	Y
NM_000070	307	2772	204	ATGACAG	Y
NM_173087	307	2496	26	ATGCATG	Y
NM_173087	307	2496	30	ATGCTGC	Y
NM_173087	307	2496	103	ATGGCTT	Y
NM_173087	307	2496	134	ATGGACA	Y
NM_173087	307	2496	160	ATGGGCT	Y
NM_173087	307	2496	183	ATGTGGA	Y
NM_173087	307	2496	204	ATGACAG	Y
NM_173090	277	747	48	ATGACCA	Y
NM_173090	277	747	107	ATGCTGG	Y
NM_173090	277	747	159	ATGGGAG	Y
NM_173090	277	747	272	ATGACAT	N
NM_173088	170	1099	70	ATGGAGG	Y
NM_080590	151	639	12	ATGCAGC	N
NM_004058	151	720	12	ATGCAGC	N
NM_006135	393	1253	88	ATGGAGG	Y
NM_006135	393	1253	139	ATGGATG	Y
NM_006135	393	1253	143	ATGGGAA	Y
NM_006135	393	1253	150	ATGAGTG	Y
NM_006135	393	1253	268	ATGGGGC	Y
NM_173060	167	2227	73	ATGCAGA	Y
NM_001190442	304	2391	131	ATGTCAG	N
NM_001190442	304	2391	188	ATGAGAA	N
NM_001190442	304	2391	236	ATGCTGG	N
NM_004930	135	953	34	ATGTTCA	N
NM_032982	242	1600	166	ATGTGGG	N
NM_032983	242	568	166	ATGTGGG	N
NM_004346	264	1097	52	ATGGGTG	Y
NM_032991	97	930	52	ATGGGTG	Y
NM_033306	275	1240	8	ATGGCAG	Y
NM_033306	275	1240	41	ATGCACT	Y
NM_033306	275	1240	49	ATGTTTT	Y
NM_033306	275	1240	204	ATGTACT	Y
NM_033306	275	1240	246	ATGCTAA	N
NM_033340	175	936	138	ATGCCAC	N
NM_001227	313	1224	89	ATGCGTG	N
NM_033339	387	1298	89	ATGCGTG	Y
NM_033339	387	1298	376	ATGTTAC	N
NM_033338	321	1331	89	ATGCGTG	N
NM_033338	321	1331	313	ATGCTGT	N
NM_033356	141	1535	58	ATGCTCA	Y
NM_033356	141	1535	66	ATGGTAG	Y
NM_001229	246	1496	95	ATGCGTC	Y
NM_032996	326	1327	3	ATGCGTC	Y
NM_032996	326	1327	159	ATGCGTC	Y
NM_001230	419	1858	7	ATGGAGA	Y
NM_001230	419	1858	196	ATGACAT	Y
NM_001230	419	1858	292	ATGGGAG	Y
NM_032974	419	1984	7	ATGGAGA	Y
NM_032974	419	1984	196	ATGACAT	Y
NM_032974	419	1984	292	ATGGGAG	Y
NM_032977	419	1987	7	ATGGAGA	Y
NM_032977	419	1987	196	ATGACAT	Y
NM_032977	419	1987	292	ATGGGAG	Y
NM_001232	265	1464	24	ATGCGTG	N
NM_001178065	439	3705	220	ATGATGT	Y
NM_001178065	439	3705	223	ATGTGGC	Y
NM_001178065	439	3705	284	ATGGAGA	Y
NM_001178065	439	3705	336	ATGTGTC	Y
NM_000388	373	3609	127	ATGAAAG	Y
NM_000388	373	3609	154	ATGATGT	Y
NM_000388	373	3609	157	ATGTGGC	Y
NM_000388	373	3609	218	ATGGAGA	Y
NM_000388	373	3609	270	ATGTGTC	Y
NM_001753	279	815	72	ATGTGCC	Y
NM_001172895	861	1304	55	ATGTCTG	Y
NM_001172895	861	1304	230	ATGGGCC	Y
NM_001172895	861	1304	265	ATGTTTT	Y
NM_001172895	861	1304	272	ATGTTTT	Y
NM_001172895	861	1304	283	ATGGAGA	Y
NM_001172895	861	1304	382	ATGGGTC	Y
NM_001172895	861	1304	393	ATGCTCC	Y
NM_001233	393	881	54	ATGACAG	Y
NM_198212	393	731	54	ATGACAG	Y
NM_001024630	211	1776	7	ATGCTTC	N
NM_001024630	211	1776	96	ATGGTTA	Y
NM_001015051	211	1710	7	ATGCTTC	N
NM_001015051	211	1710	96	ATGGTTA	Y
NM_001001890	1579	2940	231	ATGTTTT	Y
NM_001001890	1579	2940	360	ATGTGCG	Y
NM_001001890	1579	2940	562	ATGTAGA	Y
NM_001001890	1579	2940	601	ATGTGTG	Y
NM_001001890	1579	2940	689	ATGTGGG	Y
NM_001001890	1579	2940	736	ATGATTG	Y
NM_001001890	1579	2940	829	ATGACAA	Y
NM_001001890	1579	2940	913	ATGGATT	Y
NM_001001890	1579	2940	964	ATGAAGT	Y
NM_001001890	1579	2940	978	ATGTATA	Y
NM_001001890	1579	2940	1069	ATGATAA	Y
NM_001001890	1579	2940	1176	ATGTGTT	Y
NM_001001890	1579	2940	1225	ATGAGAA	Y
NM_001001890	1579	2940	1318	ATGCACT	Y
NM_001001890	1579	2940	1482	ATGTTGG	N
NM_001754	191	1633	105	ATGCAAA	N
NM_001122607	1579	2331	231	ATGTTTT	Y
NM_001122607	1579	2331	360	ATGTGCG	Y
NM_001122607	1579	2331	562	ATGTAGA	Y
NM_001122607	1579	2331	601	ATGTGTG	Y
NM_001122607	1579	2331	689	ATGTGGG	Y
NM_001122607	1579	2331	736	ATGATTG	Y
NM_001122607	1579	2331	829	ATGACAA	Y
NM_001122607	1579	2331	913	ATGGATT	Y
NM_001122607	1579	2331	964	ATGAAGT	Y
NM_001122607	1579	2331	978	ATGTATA	Y
NM_001122607	1579	2331	1069	ATGATAA	Y
NM_001122607	1579	2331	1176	ATGTGTT	Y
NM_001122607	1579	2331	1225	ATGAGAA	Y
NM_001122607	1579	2331	1318	ATGCACT	Y
NM_001122607	1579	2331	1482	ATGTTGG	N
NM_004349	412	2145	176	ATGTGCT	Y
NM_004349	412	2145	285	ATGCCGC	Y
NM_004349	412	2145	305	ATGGCCC	Y
NM_004349	412	2145	347	ATGAGCC	Y
NM_175634	456	2270	343	ATGGTGG	Y
NM_175635	259	1962	26	ATGATTC	Y
NM_175635	259	1962	62	ATGTAAC	Y
NM_175635	259	1962	69	ATGTTAT	Y
NM_175636	341	2044	114	ATGAGGT	Y
NM_175636	341	2044	159	ATGATAA	Y
NM_175636	341	2044	213	ATGTTGA	Y
NM_175636	341	2044	295	ATGTTCC	Y
NM_001198625	761	2494	133	ATGCACG	Y
NM_001198625	761	2494	188	ATGTGCC	Y
NM_001198625	761	2494	229	ATGTGTG	Y
NM_001198625	761	2494	240	ATGAATA	Y
NM_001198625	761	2494	459	ATGATAA	Y
NM_001198625	761	2494	482	ATGAAAT	Y
NM_001198625	761	2494	598	ATGATAT	Y
NM_001198625	761	2494	696	ATGAGCC	Y
NM_001198626	538	2352	133	ATGCACG	Y
NM_001198626	538	2352	188	ATGTGCC	N
NM_001198626	538	2352	229	ATGTGTG	Y
NM_001198626	538	2352	240	ATGAATA	Y
NM_001198627	598	2412	133	ATGCACG	Y
NM_001198627	598	2412	188	ATGTGCC	Y
NM_001198627	598	2412	229	ATGTGTG	Y
NM_001198627	598	2412	240	ATGAATA	Y
NM_001198627	598	2412	459	ATGATAA	Y
NM_001198627	598	2412	482	ATGAAAT	Y
NM_001198628	195	2009	2	ATGCAGG	Y
NM_001198628	195	2009	64	ATGTGAA	Y
NM_001198629	321	2135	26	ATGATTC	Y
NM_001198629	321	2135	62	ATGTAAC	Y
NM_001198629	321	2135	69	ATGTTAT	Y
NM_001198630	381	2195	26	ATGATTC	Y
NM_001198630	381	2195	62	ATGTAAC	Y
NM_001198630	381	2195	69	ATGTTAT	Y
NM_001198630	381	2195	242	ATGATAA	Y
NM_001198630	381	2195	265	ATGAAAT	Y
NM_001198631	394	2208	133	ATGCACG	Y
NM_001198631	394	2208	188	ATGTGCC	N
NM_001198631	394	2208	229	ATGTGTG	Y
NM_001198631	394	2208	240	ATGAATA	N
NM_001198632	393	2126	26	ATGATTC	Y
NM_001198632	393	2126	62	ATGTAAC	Y
NM_001198632	393	2126	69	ATGTTAT	Y
NM_001198632	393	2126	266	ATGCCGC	Y
NM_001198632	393	2126	286	ATGGCCC	Y
NM_001198632	393	2126	328	ATGAGCC	Y
NM_001198634	188	2035	133	ATGCACG	N
NM_001198679	188	2179	133	ATGCACG	N
NM_005187	290	2251	75	ATGAGCC	Y
NM_001031680	440	1729	99	ATGATAC	Y
NM_004350	412	1659	179	ATGCGGG	Y
NM_001756	105	1322	25	ATGCTAG	N
NM_004352	367	948	111	ATGCATC	Y
NM_000071	246	1901	148	ATGTATC	Y
NM_000071	246	1901	168	ATGACAG	Y
NM_001178008	223	1878	145	ATGACAG	Y
NM_001178009	223	1878	145	ATGACAG	Y
NM_004059	186	1454	13	ATGAGGA	Y
NM_001122671	180	1448	13	ATGAGGA	N
NM_001122672	186	1304	13	ATGAGGA	Y
NM_000729	870	1217	233	ATGGGGT	Y
NM_000729	870	1217	594	ATGCGGC	Y
NM_000729	870	1217	740	ATGACTG	Y
NM_000730	154	1440	4	ATGGCTG	Y
NM_000730	154	1440	93	ATGAGCC	Y
NM_194454	546	2756	83	ATGGTGC	Y
NM_194454	546	2756	153	ATGTTTT	Y
NM_194454	546	2756	241	ATGTGCC	Y
NM_194454	546	2756	291	ATGTTAG	Y
NM_194454	546	2756	310	ATGGACA	Y
NM_194454	546	2756	321	ATGGCAG	Y
NM_194454	546	2756	367	ATGCCCT	Y
NM_194454	546	2756	402	ATGCGTC	Y
NM_194454	546	2756	517	ATGATGT	Y
NM_194454	546	2756	520	ATGTAGG	Y
NM_194454	546	2756	539	ATGAGCA	N
NM_194455	1020	3230	269	ATGGTGC	Y
NM_194455	1020	3230	468	ATGAGAA	Y
NM_194455	1020	3230	531	ATGTAGC	Y
NM_194455	1020	3230	715	ATGTGCC	Y
NM_194455	1020	3230	765	ATGTTAG	Y
NM_194455	1020	3230	784	ATGGACA	Y
NM_194455	1020	3230	795	ATGGCAG	Y
NM_194455	1020	3230	841	ATGCCCT	Y
NM_194455	1020	3230	876	ATGCGTC	Y
NM_194455	1020	3230	991	ATGATGT	Y
NM_194455	1020	3230	994	ATGTAGG	Y
NM_194455	1020	3230	1013	ATGAGCA	N
NM_004912	893	3103	67	ATGGTGC	Y
NM_004912	893	3103	266	ATGAGAA	Y
NM_004912	893	3103	329	ATGTAGC	Y
NM_004912	893	3103	500	ATGTTTT	Y
NM_004912	893	3103	588	ATGTGCC	Y
NM_004912	893	3103	638	ATGTTAG	Y
NM_004912	893	3103	657	ATGGACA	Y
NM_004912	893	3103	668	ATGGCAG	Y
NM_004912	893	3103	714	ATGCCCT	Y
NM_004912	893	3103	749	ATGCGTC	Y
NM_004912	893	3103	864	ATGATGT	Y
NM_004912	893	3103	867	ATGTAGG	Y
NM_004912	893	3103	886	ATGAGCA	N
NM_001013406	398	2464	83	ATGGTGC	Y
NM_001013406	398	2464	153	ATGTTTT	Y
NM_001013406	398	2464	241	ATGTGCC	Y
NM_001013406	398	2464	291	ATGTTAG	Y
NM_001013406	398	2464	310	ATGGACA	Y
NM_001013406	398	2464	321	ATGGCAG	Y
NM_001013406	398	2464	367	ATGCCCT	N
NM_194456	785	2995	221	ATGTAGC	Y
NM_194456	785	2995	392	ATGTTTT	Y
NM_194456	785	2995	480	ATGTGCC	Y
NM_194456	785	2995	530	ATGTTAG	Y
NM_194456	785	2995	549	ATGGACA	Y
NM_194456	785	2995	560	ATGGCAG	Y
NM_194456	785	2995	606	ATGCCCT	Y
NM_194456	785	2995	641	ATGCGTC	Y
NM_194456	785	2995	756	ATGATGT	Y
NM_194456	785	2995	759	ATGTAGG	Y
NM_194456	785	2995	778	ATGAGCA	N
NM_005190	288	1139	227	ATGGTCG	N
NM_001013399	321	917	104	ATGGATT	Y
NM_001013399	321	917	202	ATGTTAT	Y
NM_001013399	321	917	283	ATGCCAG	Y
NM_001136126	547	837	28	ATGAGCC	Y
NM_001136126	547	837	227	ATGCCGG	Y
NM_001136126	547	837	431	ATGATTT	N
NM_001136126	547	837	500	ATGCCCA	N
NM_001136017	418	1053	28	ATGAGCC	Y
NM_001136017	418	1053	227	ATGCCGG	N
NM_001136017	418	1053	375	ATGTGAG	Y
NM_057182	58	1245	38	ATGCGAA	N
NM_004354	304	1338	125	ATGGAGC	Y
NM_004354	304	1338	177	ATGCCGG	Y
NM_001239	240	1211	65	ATGCAAC	Y
NM_001239	240	1211	188	ATGCGTT	N
NM_001199189	513	1325	59	ATGCGTT	Y
NM_001199189	513	1325	111	ATGTACC	Y
NM_001199189	513	1325	203	ATGCAAA	Y
NM_001199189	513	1325	427	ATGGCAG	Y
NM_001199189	513	1325	481	ATGATCC	N
NM_001199189	513	1325	505	ATGAAGA	N
NM_001240	324	2504	253	ATGTGGG	Y
NM_058241	34	2226	5	ATGAAGG	N
NM_001241	34	2025	5	ATGAAGG	N
NM_001762	165	1760	28	ATGGCGG	N
NM_001009186	165	1625	28	ATGGCGG	N
NM_001763	534	1517	39	ATGTTAA	Y
NM_001763	534	1517	53	ATGTGAA	Y
NM_001763	534	1517	59	ATGTAGT	Y
NM_001763	534	1517	97	ATGGGAA	Y
NM_001763	534	1517	143	ATGGGAG	Y
NM_001763	534	1517	183	ATGCTCT	Y
NM_001763	534	1517	196	ATGATTG	Y
NM_001763	534	1517	211	ATGTCCT	Y
NM_001763	534	1517	239	ATGCCAC	Y
NM_001763	534	1517	351	ATGAGAG	Y
NM_001763	534	1517	529	ATGATAT	N
[truncated: 43,512 more rows]

## Sheet: count_details
Table 1.c
RNA ID	Number of uATGs in 5' UTRs
NM_000014	1
NM_000015	0
NM_000016	3
NM_000017	0
NM_000018	2
NM_000019	0
NM_000020	0
NM_000021	2
NM_000022	0
NM_000023	0
NM_000024	1
NM_000025	2
NM_000026	0
NM_000027	0
NM_000028	5
NM_000029	5
NM_000030	0
NM_000031	2
NM_000032	2
NM_000033	0
NM_000034	5
NM_000035	0
NM_000036	0
NM_000037	0
NM_000038	2
NM_000039	0
NM_000040	0
NM_000041	0
NM_000042	0
NM_000043	1
NM_000044	1
NM_000045	0
NM_000046	15
NM_000047	2
NM_000048	0
NM_000049	0
NM_000050	1
NM_000051	5
NM_000052	2
NM_000053	1
NM_000054	0
NM_000055	2
NM_000056	0
NM_000057	0
NM_000059	0
NM_000060	1
NM_000061	2
NM_000062	0
NM_000063	2
NM_000064	0
NM_000065	1
NM_000066	1
NM_000067	0
NM_000068	2
NM_000069	0
NM_000070	7
NM_000071	2
NM_000072	4
NM_000073	0
NM_000074	1
NM_000075	3
NM_000076	0
NM_000077	0
NM_000078	0
NM_000079	0
NM_000080	0
NM_000081	3
NM_000082	1
NM_000083	0
NM_000084	4
NM_000085	1
NM_000086	5
NM_000087	2
NM_000088	2
NM_000089	5
NM_000090	3
NM_000091	0
NM_000092	1
NM_000093	1
NM_000094	0
NM_000095	0
NM_000096	2
NM_000097	0
NM_000098	2
NM_000099	0
NM_000100	0
NM_000101	0
NM_000102	1
NM_000103	0
NM_000104	2
NM_000106	0
NM_000107	2
NM_000108	2
NM_000109	11
NM_000110	0
NM_000111	5
NM_000112	1
NM_000113	0
NM_000114	2
NM_000115	0
NM_000116	0
NM_000117	1
NM_000118	1
NM_000119	2
NM_000120	0
NM_000121	0
NM_000122	1
NM_000123	2
NM_000124	1
NM_000125	1
NM_000126	0
NM_000127	7
NM_000128	4
NM_000129	0
NM_000130	0
NM_000131	2
NM_000132	1
NM_000133	0
NM_000134	0
NM_000135	0
NM_000136	2
NM_000137	0
NM_000138	0
NM_000139	2
NM_000140	0
NM_000141	6
NM_000142	1
NM_000143	0
NM_000144	1
NM_000145	3
NM_000146	0
NM_000147	0
NM_000148	7
NM_000149	5
NM_000150	14
NM_000151	1
NM_000152	1
NM_000153	2
NM_000154	0
NM_000155	0
NM_000156	0
NM_000157	2
NM_000158	0
NM_000159	0
NM_000160	1
NM_000161	0
NM_000162	5
NM_000163	0
NM_000164	0
NM_000165	0
NM_000166	4
NM_000167	0
NM_000168	2
NM_000169	1
NM_000170	0
NM_000171	0
NM_000172	0
NM_000173	0
NM_000174	0
NM_000175	0
NM_000176	2
NM_000177	0
NM_000178	0
NM_000179	1
NM_000180	0
NM_000181	2
NM_000182	0
NM_000183	1
NM_000184	0
NM_000185	1
NM_000186	1
NM_000187	1
NM_000188	0
NM_000189	24
NM_000190	0
NM_000191	0
NM_000192	5
NM_000193	1
NM_000194	0
NM_000195	3
NM_000196	0
NM_000197	0
NM_000198	1
NM_000199	0
NM_000200	0
NM_000201	1
NM_000202	1
NM_000203	1
NM_000204	1
NM_000206	1
NM_000207	0
NM_000208	1
NM_000209	0
NM_000210	0
NM_000211	0
NM_000212	0
NM_000213	0
NM_000214	2
NM_000215	0
NM_000216	0
NM_000217	5
NM_000218	0
NM_000219	4
NM_000220	0
NM_000221	1
NM_000222	0
NM_000223	0
NM_000224	0
NM_000226	0
NM_000227	0
NM_000228	0
NM_000229	0
NM_000230	0
NM_000231	0
NM_000232	0
NM_000233	0
NM_000234	0
NM_000235	0
NM_000236	0
NM_000237	2
NM_000238	1
NM_000239	0
NM_000240	0
NM_000242	1
NM_000243	0
NM_000244	0
NM_000245	2
NM_000246	2
NM_000248	0
NM_000249	1
NM_000250	1
NM_000251	0
NM_000252	0
NM_000253	4
NM_000254	2
NM_000255	4
NM_000256	0
NM_000257	0
NM_000258	0
NM_000259	1
NM_000260	0
NM_000261	0
NM_000262	2
NM_000263	4
NM_000264	0
NM_000265	0
NM_000266	7
NM_000267	2
NM_000268	3
NM_000269	0
NM_000270	0
NM_000271	0
NM_000272	1
NM_000273	3
NM_000274	0
NM_000275	0
NM_000276	0
NM_000277	1
NM_000278	2
NM_000280	6
NM_000281	2
NM_000282	0
NM_000283	1
NM_000284	1
NM_000285	2
NM_000286	2
NM_000287	0
NM_000288	0
NM_000289	1
NM_000290	0
NM_000291	0
NM_000292	0
NM_000293	0
NM_000294	1
NM_000295	1
NM_000296	2
NM_000297	0
NM_000298	1
NM_000299	1
NM_000300	0
NM_000301	2
NM_000302	0
NM_000303	0
NM_000304	0
NM_000305	1
NM_000306	2
NM_000307	1
NM_000308	2
NM_000309	0
NM_000310	2
NM_000311	4
NM_000312	2
NM_000313	2
NM_000314	5
NM_000315	1
NM_000316	3
NM_000317	0
NM_000318	2
NM_000319	0
NM_000320	0
NM_000321	0
NM_000322	1
NM_000324	0
NM_000325	1
NM_000326	1
NM_000327	3
NM_000328	1
NM_000329	0
NM_000330	0
NM_000331	0
NM_000332	12
NM_000333	7
NM_000334	1
NM_000335	2
NM_000336	0
NM_000337	6
NM_000338	2
NM_000339	0
NM_000340	3
NM_000341	0
NM_000342	1
NM_000343	0
NM_000344	1
NM_000345	0
NM_000346	0
NM_000347	1
NM_000348	0
NM_000349	4
NM_000350	1
NM_000351	4
NM_000352	0
NM_000353	0
NM_000354	1
NM_000355	2
NM_000356	0
NM_000358	0
NM_000359	0
NM_000360	0
NM_000361	0
NM_000362	9
NM_000363	0
NM_000364	0
NM_000365	0
NM_000366	1
NM_000367	2
NM_000368	3
NM_000369	2
NM_000370	0
NM_000371	0
NM_000372	0
NM_000373	0
NM_000374	2
NM_000375	2
NM_000376	0
NM_000377	0
NM_000378	0
NM_000379	0
NM_000380	0
NM_000381	5
NM_000382	1
NM_000383	0
NM_000384	0
NM_000386	0
NM_000387	0
NM_000388	5
NM_000389	0
NM_000390	1
NM_000391	2
NM_000392	3
NM_000393	4
NM_000394	0
NM_000395	3
NM_000396	3
NM_000397	0
NM_000398	0
NM_000399	0
NM_000400	1
NM_000401	0
NM_000402	1
NM_000403	1
NM_000404	0
NM_000405	0
NM_000406	30
NM_000407	0
NM_000408	0
NM_000409	8
NM_000410	0
NM_000411	5
NM_000412	1
NM_000413	13
NM_000414	0
NM_000415	1
NM_000416	0
NM_000417	2
NM_000418	2
NM_000419	0
NM_000420	0
NM_000421	0
NM_000422	0
NM_000423	0
NM_000424	0
NM_000425	0
NM_000426	0
NM_000427	0
NM_000428	1
NM_000429	0
NM_000430	2
NM_000431	1
NM_000432	0
NM_000433	3
NM_000434	0
NM_000435	0
NM_000436	0
NM_000437	2
NM_000438	0
NM_000439	0
NM_000440	1
NM_000441	1
NM_000442	2
NM_000443	0
NM_000444	1
NM_000445	0
NM_000446	0
NM_000447	2
NM_000448	0
NM_000449	5
NM_000450	0
NM_000451	7
NM_000452	14
NM_000453	1
NM_000454	0
NM_000455	3
NM_000456	1
NM_000457	0
NM_000458	3
NM_000459	10
NM_000460	1
NM_000461	6
NM_000463	0
NM_000465	0
NM_000466	0
NM_000474	0
NM_000475	0
NM_000476	1
NM_000477	0
NM_000478	0
NM_000479	1
NM_000480	0
NM_000481	0
NM_000482	0
NM_000483	0
NM_000484	0
NM_000485	0
NM_000486	0
NM_000487	0
NM_000488	0
NM_000489	1
NM_000490	0
NM_000491	0
NM_000492	1
NM_000493	0
NM_000494	1
NM_000495	1
NM_000496	0
NM_000497	0
NM_000498	0
NM_000499	0
NM_000500	1
NM_000501	0
NM_000502	1
NM_000503	9
NM_000504	0
NM_000505	1
NM_000506	0
NM_000507	0
NM_000508	0
NM_000509	0
NM_000510	0
NM_000511	1
NM_000512	0
NM_000513	0
NM_000514	2
NM_000515	0
NM_000516	0
NM_000517	0
NM_000518	0
NM_000519	2
NM_000520	0
NM_000521	0
NM_000522	1
NM_000523	1
NM_000525	4
NM_000526	0
NM_000527	2
NM_000528	0
NM_000529	0
NM_000530	1
NM_000531	1
NM_000532	1
NM_000533	0
NM_000534	2
NM_000535	1
NM_000536	0
NM_000537	0
NM_000538	0
NM_000539	0
NM_000540	0
NM_000541	3
NM_000542	3
NM_000543	0
NM_000544	0
NM_000545	0
NM_000546	1
NM_000547	0
NM_000548	0
NM_000549	2
NM_000550	0
NM_000551	0
NM_000552	2
NM_000553	9
NM_000554	4
NM_000555	4
NM_000557	2
NM_000558	0
NM_000559	0
NM_000560	1
NM_000561	0
NM_000562	0
NM_000564	12
NM_000565	4
NM_000566	1
NM_000567	0
NM_000569	3
NM_000570	4
NM_000572	0
NM_000573	2
NM_000574	1
NM_000575	9
NM_000576	0
NM_000577	2
NM_000578	8
NM_000579	4
NM_000581	0
NM_000582	1
NM_000583	2
NM_000584	1
NM_000585	10
NM_000586	0
NM_000587	1
NM_000588	0
NM_000589	4
NM_000590	0
NM_000591	2
NM_000593	1
NM_000594	0
NM_000595	0
NM_000596	0
NM_000597	0
NM_000598	1
NM_000599	0
NM_000600	1
NM_000601	0
NM_000602	0
NM_000603	4
NM_000605	0
NM_000606	0
NM_000607	0
NM_000608	0
NM_000609	0
NM_000610	0
NM_000611	1
NM_000612	0
NM_000613	0
NM_000614	0
NM_000615	0
NM_000616	0
NM_000617	1
NM_000618	3
NM_000619	0
NM_000620	12
NM_000621	14
NM_000623	2
NM_000624	2
NM_000625	1
NM_000626	0
NM_000627	0
NM_000628	0
NM_000629	2
NM_000631	0
NM_000632	0
NM_000633	6
NM_000634	0
NM_000635	0
NM_000636	0
NM_000637	1
NM_000638	0
NM_000639	1
NM_000640	1
NM_000641	1
NM_000642	1
NM_000643	2
NM_000644	1
NM_000645	6
NM_000646	4
NM_000651	2
NM_000655	2
NM_000657	6
NM_000658	5
NM_000660	0
NM_000661	1
NM_000662	1
NM_000663	9
NM_000665	0
NM_000666	0
NM_000667	2
NM_000668	1
NM_000669	1
NM_000670	0
NM_000671	2
NM_000672	0
NM_000673	1
NM_000674	3
NM_000675	5
NM_000676	3
NM_000677	10
NM_000678	0
NM_000679	2
NM_000680	6
NM_000681	6
NM_000683	0
NM_000684	0
NM_000685	4
NM_000686	1
NM_000687	2
NM_000688	4
NM_000689	0
NM_000690	2
NM_000691	1
NM_000692	1
NM_000693	0
NM_000694	0
NM_000695	2
NM_000696	0
NM_000697	0
NM_000698	1
NM_000699	1
NM_000700	0
NM_000701	0
NM_000702	0
NM_000704	0
NM_000705	0
NM_000706	16
NM_000707	0
NM_000709	0
NM_000710	0
NM_000712	0
NM_000713	0
NM_000714	1
NM_000715	1
NM_000716	0
NM_000717	0
NM_000718	1
NM_000719	5
NM_000720	1
NM_000721	1
NM_000722	0
NM_000723	1
NM_000724	9
NM_000725	0
NM_000726	1
NM_000727	0
NM_000728	0
NM_000729	3
NM_000730	2
NM_000732	1
NM_000733	2
NM_000734	0
NM_000735	0
NM_000737	0
NM_000738	2
NM_000739	3
NM_000740	11
NM_000742	10
NM_000743	1
NM_000744	1
NM_000745	1
NM_000746	0
NM_000747	0
NM_000748	1
NM_000749	1
NM_000750	0
NM_000751	0
NM_000754	0
NM_000755	0
NM_000756	3
NM_000757	2
NM_000758	0
NM_000759	2
NM_000760	4
NM_000761	0
NM_000762	0
NM_000764	6
NM_000765	0
NM_000766	0
NM_000767	0
NM_000770	1
NM_000771	0
NM_000772	1
NM_000773	0
NM_000774	0
NM_000775	0
NM_000777	0
NM_000778	0
NM_000779	3
NM_000780	0
NM_000781	1
NM_000782	1
NM_000783	0
NM_000784	0
NM_000785	2
NM_000786	0
NM_000787	0
NM_000788	0
NM_000789	0
NM_000790	0
NM_000791	4
NM_000792	0
NM_000793	2
NM_000794	8
NM_000795	2
NM_000796	6
NM_000798	3
NM_000799	1
NM_000800	0
NM_000801	0
NM_000802	0
NM_000803	1
NM_000804	0
NM_000805	0
NM_000806	10
NM_000807	0
NM_000808	0
NM_000809	6
NM_000810	5
NM_000811	2
NM_000812	6
NM_000813	2
NM_000814	0
NM_000815	0
NM_000816	4
NM_000817	0
NM_000818	2
NM_000819	0
NM_000820	2
NM_000821	0
NM_000823	0
NM_000824	0
NM_000825	36
NM_000826	4
NM_000827	3
NM_000828	1
NM_000829	3
NM_000830	5
NM_000831	0
NM_000832	1
NM_000833	6
NM_000834	3
NM_000835	2
NM_000836	1
NM_000837	0
NM_000838	1
NM_000839	0
NM_000840	12
NM_000841	3
NM_000842	7
NM_000843	0
NM_000844	0
NM_000845	6
NM_000846	0
NM_000847	0
NM_000848	0
NM_000849	2
NM_000850	0
NM_000851	1
NM_000852	0
NM_000853	0
NM_000854	0
NM_000855	2
NM_000856	3
NM_000857	1
NM_000858	2
NM_000859	0
NM_000860	0
NM_000861	2
NM_000862	3
NM_000864	6
NM_000865	5
NM_000866	0
NM_000867	11
NM_000868	7
NM_000869	2
NM_000870	1
NM_000872	2
NM_000873	2
NM_000874	2
NM_000875	0
NM_000876	0
NM_000877	1
NM_000878	3
NM_000879	1
NM_000880	9
NM_000882	1
NM_000883	0
NM_000884	0
NM_000885	2
NM_000887	0
NM_000890	2
NM_000891	6
NM_000892	0
NM_000893	2
NM_000894	0
NM_000896	0
NM_000898	0
NM_000899	2
NM_000900	0
NM_000901	1
NM_000902	1
NM_000903	1
NM_000904	0
NM_000905	0
NM_000906	2
NM_000908	5
NM_000909	6
NM_000911	0
NM_000912	1
NM_000913	2
NM_000914	3
NM_000915	0
NM_000916	0
NM_000917	0
NM_000918	0
NM_000919	4
NM_000920	0
NM_000921	0
NM_000922	1
NM_000923	1
NM_000924	0
NM_000925	0
NM_000926	6
NM_000927	1
NM_000928	0
NM_000929	3
NM_000930	1
NM_000932	0
NM_000933	0
NM_000934	0
NM_000935	0
NM_000936	0
NM_000937	0
NM_000938	0
NM_000939	0
NM_000940	0
NM_000941	0
NM_000942	0
NM_000943	0
NM_000944	1
NM_000945	0
NM_000946	0
NM_000947	1
NM_000948	11
NM_000949	11
NM_000950	1
NM_000951	0
NM_000952	2
NM_000953	0
NM_000954	0
NM_000955	1
NM_000956	1
NM_000958	1
NM_000959	4
NM_000960	0
NM_000961	0
NM_000962	1
NM_000963	0
NM_000964	2
NM_000965	6
NM_000966	3
NM_000967	1
NM_000968	0
NM_000969	0
NM_000970	0
NM_000971	0
NM_000972	0
NM_000973	0
NM_000975	0
NM_000976	0
NM_000977	0
NM_000978	0
NM_000979	0
NM_000980	0
NM_000981	1
NM_000982	0
NM_000983	0
NM_000984	0
NM_000985	6
NM_000986	0
NM_000987	0
NM_000988	0
NM_000989	0
NM_000990	1
NM_000991	0
NM_000992	1
NM_000993	0
NM_000994	0
NM_000995	0
NM_000996	0
NM_000997	0
NM_000998	0
NM_000999	0
NM_001000	0
NM_001001	0
NM_001001132	2
NM_001001290	2
NM_001001317	1
NM_001001323	3
NM_001001329	2
NM_001001330	0
NM_001001331	4
NM_001001342	7
NM_001001343	4
NM_001001344	0
NM_001001346	6
NM_001001349	1
NM_001001389	0
NM_001001390	0
NM_001001391	0
NM_001001392	0
NM_001001394	0
NM_001001395	4
NM_001001396	4
NM_001001410	0
NM_001001412	1
NM_001001417	1
NM_001001418	1
NM_001001419	7
NM_001001420	4
NM_001001430	0
NM_001001431	0
NM_001001432	0
NM_001001433	1
NM_001001435	0
NM_001001437	0
NM_001001438	0
NM_001001480	0
NM_001001481	1
NM_001001483	5
NM_001001484	0
NM_001001485	2
NM_001001486	2
NM_001001487	2
NM_001001502	0
NM_001001520	0
NM_001001521	2
NM_001001522	4
NM_001001523	0
NM_001001524	0
NM_001001547	7
NM_001001548	4
NM_001001549	1
NM_001001550	3
NM_001001551	0
NM_001001552	1
NM_001001555	3
NM_001001556	0
NM_001001557	0
NM_001001560	3
NM_001001561	3
NM_001001563	0
NM_001001567	0
NM_001001568	1
NM_001001569	0
NM_001001570	0
NM_001001571	1
NM_001001572	4
NM_001001573	4
NM_001001574	0
NM_001001575	1
NM_001001576	3
NM_001001577	1
NM_001001578	0
NM_001001579	5
NM_001001580	3
NM_001001581	1
NM_001001582	1
NM_001001583	0
NM_001001584	5
NM_001001585	6
NM_001001655	1
NM_001001660	3
NM_001001661	1
NM_001001664	1
NM_001001665	1
NM_001001666	0
NM_001001668	7
NM_001001669	0
NM_001001670	0
NM_001001694	2
NM_001001701	1
NM_001001709	0
NM_001001711	4
NM_001001712	0
NM_001001713	1
NM_001001715	2
NM_001001716	1
NM_001001722	3
NM_001001732	5
NM_001001734	0
NM_001001740	1
NM_001001786	7
NM_001001790	0
NM_001001791	8
NM_001001794	0
NM_001001851	0
NM_001001852	0
NM_001001874	1
NM_001001875	1
NM_001001877	2
NM_001001888	8
NM_001001890	15
NM_001001891	0
NM_001001894	0
NM_001001895	0
NM_001001917	0
NM_001001922	1
NM_001001924	2
NM_001001925	2
NM_001001928	0
NM_001001931	5
NM_001001933	2
NM_001001936	0
NM_001001937	0
NM_001001938	0
NM_001001955	1
NM_001001971	3
NM_001001973	1
NM_001001974	1
NM_001001975	0
NM_001001976	0
NM_001001977	0
NM_001001991	0
NM_001001992	4
NM_001001994	0
NM_001001995	4
NM_001001996	4
NM_001001998	0
NM_001002	1
NM_001002000	2
NM_001002001	2
NM_001002002	0
NM_001002006	3
NM_001002010	1
NM_001002017	0
NM_001002018	0
NM_001002019	1
NM_001002020	1
NM_001002026	0
NM_001002027	0
NM_001002029	0
NM_001002030	1
NM_001002031	7
NM_001002032	4
NM_001002033	8
NM_001002034	0
NM_001002231	0
NM_001002235	1
NM_001002236	3
NM_001002243	5
NM_001002244	0
NM_001002245	0
NM_001002246	1
NM_001002247	0
NM_001002248	1
NM_001002249	1
NM_001002251	0
NM_001002252	0
NM_001002254	0
NM_001002255	0
NM_001002257	1
NM_001002258	0
NM_001002259	11
NM_001002261	0
NM_001002262	0
NM_001002264	0
NM_001002265	5
NM_001002266	5
NM_001002269	0
NM_001002273	0
NM_001002274	0
NM_001002275	0
NM_001002292	0
NM_001002294	0
NM_001002295	1
NM_001002296	1
NM_001002755	0
NM_001002756	4
NM_001002757	4
NM_001002758	4
NM_001002759	0
NM_001002760	8
NM_001002761	8
NM_001002762	1
NM_001002796	8
NM_001002800	0
NM_001002810	5
NM_001002811	2
NM_001002812	5
NM_001002814	0
NM_001002836	0
NM_001002837	0
NM_001002838	4
NM_001002840	5
NM_001002841	0
NM_001002843	2
NM_001002844	2
NM_001002857	0
NM_001002858	0
NM_001002860	5
NM_001002862	0
NM_001002876	0
NM_001002877	3
NM_001002878	3
NM_001002879	1
NM_001002880	7
NM_001002901	0
NM_001002906	10
NM_001002909	0
NM_001002911	0
NM_001002912	0
NM_001002914	1
NM_001002915	5
NM_001002916	0
NM_001002919	0
NM_001002920	0
NM_001002926	0
NM_001003	0
NM_001003395	2
NM_001003396	0
NM_001003397	0
NM_001003398	0
NM_001003407	4
NM_001003408	4
NM_001003652	0
NM_001003665	0
NM_001003674	10
NM_001003675	10
NM_001003676	1
NM_001003677	1
NM_001003678	1
NM_001003679	4
NM_001003680	4
NM_001003681	1
NM_001003682	0
NM_001003683	2
NM_001003684	0
NM_001003688	2
NM_001003690	0
NM_001003692	0
NM_001003694	2
NM_001003696	0
NM_001003697	0
NM_001003698	4
NM_001003699	4
NM_001003700	4
NM_001003701	2
NM_001003702	1
NM_001003703	4
NM_001003704	0
NM_001003712	6
NM_001003713	0
NM_001003714	0
NM_001003715	0
NM_001003716	0
NM_001003722	0
NM_001003760	0
NM_001003785	0
NM_001003786	1
NM_001003787	1
NM_001003788	4
NM_001003789	0
NM_001003790	0
NM_001003791	0
NM_001003792	0
NM_001003793	0
NM_001003794	0
NM_001003795	0
NM_001003796	0
NM_001003799	0
NM_001003800	0
NM_001003801	0
NM_001003802	2
NM_001003803	4
NM_001003805	4
NM_001003806	3
NM_001003810	0
NM_001003811	5
NM_001003818	1
NM_001003819	1
NM_001003827	1
NM_001003828	1
NM_001003841	0
NM_001003845	1
NM_001003891	0
NM_001003894	5
NM_001003895	5
NM_001003897	0
NM_001003927	5
NM_001003931	5
NM_001003936	0
NM_001003937	1
NM_001003938	0
NM_001003940	0
NM_001003941	0
NM_001003954	1
NM_001003962	0
NM_001004	0
NM_001004019	0
NM_001004023	2
NM_001004051	2
NM_001004055	5
NM_001004056	2
NM_001004057	2
NM_001004060	0
NM_001004063	0
NM_001004065	0
NM_001004067	0
NM_001004105	0
NM_001004106	0
NM_001004125	3
NM_001004127	0
NM_001004128	0
NM_001004196	0
NM_001004297	3
NM_001004298	2
NM_001004301	1
NM_001004303	3
NM_001004304	2
NM_001004308	4
NM_001004309	1
NM_001004310	0
NM_001004311	0
NM_001004312	6
NM_001004316	0
NM_001004318	0
NM_001004319	5
NM_001004325	0
NM_001004326	0
NM_001004328	1
NM_001004329	0
NM_001004330	3
NM_001004333	0
NM_001004334	0
NM_001004339	1
NM_001004340	1
NM_001004341	1
NM_001004342	0
NM_001004343	1
NM_001004351	0
NM_001004353	0
NM_001004354	2
NM_001004356	2
NM_001004358	0
NM_001004360	0
NM_001004419	0
NM_001004426	0
NM_001004434	0
NM_001004439	0
NM_001004440	1
NM_001004441	2
NM_001004471	0
NM_001004489	1
NM_001004698	1
NM_001004719	3
NM_001004720	2
NM_001004722	2
NM_001004733	0
NM_001004751	2
NM_001004754	0
NM_001004756	0
NM_001004757	2
NM_001005	0
NM_001005158	7
NM_001005159	7
NM_001005161	1
NM_001005163	0
NM_001005170	0
NM_001005171	0
NM_001005172	0
NM_001005173	5
NM_001005175	0
NM_001005176	0
NM_001005180	1
NM_001005191	0
NM_001005207	4
NM_001005210	1
NM_001005212	9
NM_001005214	0
NM_001005222	0
NM_001005226	0
NM_001005242	0
NM_001005270	0
NM_001005271	0
NM_001005272	0
NM_001005273	3
NM_001005283	1
NM_001005288	0
NM_001005290	0
NM_001005291	0
NM_001005332	0
NM_001005333	0
NM_001005335	2
NM_001005336	0
NM_001005337	1
NM_001005339	0
NM_001005340	2
NM_001005353	2
NM_001005354	0
NM_001005356	0
NM_001005360	1
NM_001005361	1
NM_001005362	1
NM_001005365	0
NM_001005366	5
NM_001005367	0
NM_001005368	4
NM_001005369	7
NM_001005373	1
NM_001005374	0
NM_001005375	1
NM_001005376	0
NM_001005377	0
NM_001005386	1
NM_001005388	3
NM_001005389	3
NM_001005404	0
NM_001005405	0
NM_001005407	1
NM_001005408	0
NM_001005409	0
NM_001005413	0
NM_001005415	1
NM_001005416	1
NM_001005417	6
NM_001005463	0
NM_001005464	0
NM_001005473	0
NM_001005474	3
NM_001005476	2
NM_001005498	1
NM_001005502	0
NM_001005505	1
NM_001005526	0
NM_001005527	3
NM_001005566	0
NM_001005609	2
NM_001005610	2
NM_001005612	2
NM_001005613	2
NM_001005619	0
NM_001005731	0
NM_001005735	0
NM_001005738	0
NM_001005739	2
NM_001005741	3
NM_001005742	3
NM_001005743	2
NM_001005744	2
NM_001005745	2
NM_001005746	1
NM_001005747	3
NM_001005751	0
NM_001005752	1
NM_001005753	4
NM_001005781	0
NM_001005782	0
NM_001005783	8
NM_001005785	1
NM_001005786	1
NM_001005849	0
NM_001005851	0
NM_001005852	0
NM_001005855	2
NM_001005861	0
NM_001005862	18
NM_001005909	0
NM_001005910	0
NM_001005911	0
NM_001005914	1
NM_001005915	1
NM_001005918	1
NM_001005920	0
NM_001005922	0
NM_001006	0
NM_001006109	0
NM_001006114	0
NM_001006115	3
NM_001006117	0
NM_001006118	0
NM_001006120	0
NM_001006121	0
NM_001006600	3
NM_001006605	1
NM_001006607	0
NM_001006610	4
NM_001006612	1
NM_001006613	1
NM_001006614	1
NM_001006616	2
NM_001006617	2
NM_001006618	2
NM_001006619	2
NM_001006620	5
NM_001006621	4
NM_001006622	2
NM_001006623	2
NM_001006624	4
NM_001006625	4
NM_001006626	3
NM_001006627	2
NM_001006628	3
NM_001006629	1
NM_001006630	4
NM_001006631	3
NM_001006632	1
NM_001006634	1
NM_001006636	4
NM_001006638	0
NM_001006639	0
NM_001006640	1
NM_001006641	0
NM_001006642	0
NM_001006643	5
NM_001006655	2
NM_001006656	0
NM_001006657	0
NM_001006658	0
NM_001006665	1
NM_001006666	1
NM_001006681	1
NM_001006682	1
NM_001006683	1
NM_001006684	0
NM_001006932	0
NM_001006933	0
NM_001006935	1
NM_001006937	1
NM_001006938	0
NM_001006939	1
NM_001006941	3
NM_001006943	0
NM_001006944	1
NM_001006945	3
NM_001006946	0
NM_001006947	3
NM_001007	0
NM_001007022	1
NM_001007023	0
NM_001007024	5
NM_001007025	0
NM_001007026	1
NM_001007027	2
NM_001007067	1
NM_001007068	1
NM_001007069	1
NM_001007070	1
NM_001007072	0
NM_001007073	0
NM_001007074	0
NM_001007075	2
NM_001007088	2
NM_001007090	3
NM_001007094	13
NM_001007097	2
NM_001007098	0
NM_001007099	0
NM_001007100	0
NM_001007102	1
NM_001007139	6
NM_001007156	2
NM_001007169	2
NM_001007176	3
NM_001007188	1
NM_001007189	47
NM_001007214	2
NM_001007225	0
NM_001007226	4
NM_001007227	4
NM_001007228	4
NM_001007229	4
NM_001007230	4
NM_001007231	3
NM_001007237	8
NM_001007239	5
NM_001007240	2
NM_001007241	2
NM_001007242	2
NM_001007245	4
NM_001007246	1
NM_001007248	1
NM_001007250	0
NM_001007253	6
NM_001007255	1
NM_001007257	1
NM_001007259	0
NM_001007267	0
NM_001007269	0
NM_001007270	1
NM_001007271	0
NM_001007272	0
NM_001007273	2
NM_001007277	3
NM_001007278	0
NM_001007279	1
NM_001007464	9
NM_001007466	16
NM_001007467	3
NM_001007468	0
NM_001007469	0
NM_001007470	7
NM_001007471	5
NM_001007525	9
NM_001007527	3
NM_001007532	1
NM_001007533	0
NM_001007544	6
NM_001007551	1
NM_001007553	2
NM_001007559	0
NM_001007561	0
NM_001007565	2
NM_001007593	0
NM_001007595	0
NM_001007792	0
NM_001007793	3
NM_001007794	0
NM_001008	0
NM_001008211	5
NM_001008212	3
NM_001008213	5
NM_001008216	0
NM_001008218	1
NM_001008219	1
NM_001008220	1
NM_001008221	2
NM_001008222	3
NM_001008224	4
NM_001008225	2
NM_001008228	1
NM_001008229	1
NM_001008239	1
NM_001008270	4
NM_001008272	4
NM_001008273	1
NM_001008274	2
NM_001008387	0
NM_001008388	0
NM_001008389	0
NM_001008390	5
NM_001008391	0
NM_001008392	0
NM_001008393	2
NM_001008395	0
NM_001008396	13
NM_001008397	0
NM_001008401	6
NM_001008405	0
NM_001008410	0
NM_001008485	0
NM_001008486	0
NM_001008487	0
NM_001008489	5
NM_001008491	1
NM_001008492	2
NM_001008493	1
NM_001008494	5
NM_001008496	5
NM_001008503	3
NM_001008504	3
NM_001008505	3
NM_001008528	0
NM_001008529	0
NM_001008530	1
NM_001008534	0
NM_001008535	0
NM_001008537	2
NM_001008539	0
NM_001008540	5
NM_001008541	1
NM_001008563	2
NM_001008564	1
NM_001008566	2
NM_001008657	0
NM_001008660	0
NM_001008661	0
NM_001008662	0
NM_001008693	0
NM_001008695	1
NM_001008697	2
NM_001008699	2
NM_001008701	2
NM_001008703	7
NM_001008704	6
NM_001008707	0
NM_001008709	0
NM_001008710	0
NM_001008711	0
NM_001008712	0
NM_001008723	0
NM_001008726	6
NM_001008727	2
NM_001008738	2
NM_001008740	1
NM_001008744	1
NM_001008749	0
NM_001008777	1
NM_001008779	0
NM_001008781	3
NM_001008784	4
NM_001008800	2
NM_001008801	1
NM_001008844	1
NM_001008860	6
NM_001008892	3
NM_001008894	3
NM_001008895	0
NM_001008897	9
NM_001008901	0
NM_001008910	4
NM_001008925	1
NM_001008938	0
NM_001008949	2
NM_001009	0
NM_001009181	0
NM_001009182	1
NM_001009183	1
NM_001009184	0
NM_001009185	0
NM_001009186	1
NM_001009552	0
NM_001009554	2
NM_001009555	17
NM_001009566	1
NM_001009567	0
NM_001009568	0
NM_001009570	0
NM_001009571	0
NM_001009584	0
NM_001009608	0
NM_001009609	0
NM_001009611	0
NM_001009613	0
NM_001009811	0
NM_001009813	2
NM_001009814	0
NM_001009877	1
NM_001009880	0
NM_001009881	2
NM_001009894	0
NM_001009899	2
NM_001009905	0
NM_001009909	0
NM_001009921	2
NM_001009922	1
NM_001009923	1
NM_001009924	3
NM_001009925	2
NM_001009931	0
NM_001009932	4
NM_001009933	3
NM_001009934	2
NM_001009936	2
NM_001009939	1
NM_001009941	0
NM_001009943	0
NM_001009944	2
NM_001009955	1
NM_001009958	1
NM_001009959	2
NM_001009960	1
NM_001009984	0
NM_001009991	7
NM_001009993	0
NM_001009996	0
NM_001009997	2
NM_001009998	2
NM_001009999	0
NM_001010	0
NM_001010000	7
NM_001010845	2
NM_001010846	0
NM_001010847	0
NM_001010848	0
NM_001010851	1
NM_001010853	0
NM_001010855	0
NM_001010858	0
NM_001010861	0
NM_001010862	2
NM_001010866	0
NM_001010867	0
NM_001010870	1
NM_001010872	2
NM_001010873	2
NM_001010874	2
NM_001010875	1
NM_001010880	1
NM_001010883	0
NM_001010887	1
NM_001010888	1
NM_001010889	0
NM_001010890	0
NM_001010891	0
NM_001010892	1
NM_001010895	1
NM_001010896	2
NM_001010898	1
NM_001010903	0
NM_001010904	0
NM_001010908	5
NM_001010909	0
NM_001010911	3
NM_001010915	0
NM_001010922	1
NM_001010923	1
NM_001010924	0
NM_001010926	0
NM_001010927	3
NM_001010931	0
NM_001010932	0
NM_001010933	0
NM_001010934	0
NM_001010935	2
NM_001010938	4
NM_001010939	9
NM_001010940	0
NM_001010942	0
NM_001010969	0
NM_001010971	0
NM_001010972	0
NM_001010974	0
NM_001010980	0
NM_001010982	0
NM_001010983	6
NM_001010984	5
NM_001010985	0
NM_001010986	1
NM_001010987	1
NM_001010989	2
NM_001010990	2
NM_001011	0
NM_001011513	0
NM_001011515	0
NM_001011516	0
NM_001011537	3
NM_001011543	0
NM_001011544	4
NM_001011546	5
NM_001011547	1
NM_001011548	0
NM_001011549	0
NM_001011550	0
NM_001011551	0
NM_001011552	9
NM_001011553	0
NM_001011554	3
NM_001011645	3
NM_001011649	1
NM_001011655	0
NM_001011657	2
NM_001011658	2
NM_001011663	0
NM_001011666	0
NM_001011667	1
NM_001011668	1
NM_001011669	3
NM_001011670	0
NM_001011671	0
NM_001011699	1
NM_001011700	0
NM_001011703	0
NM_001011705	1
NM_001011708	11
NM_001011709	1
NM_001011713	0
NM_001011722	0
NM_001011724	17
NM_001011725	14
NM_001011878	2
NM_001011880	1
NM_001011885	1
NM_001012	0
NM_001012241	2
NM_001012264	0
NM_001012267	1
NM_001012270	1
NM_001012271	1
NM_001012279	8
NM_001012301	2
NM_001012302	0
NM_001012320	0
NM_001012321	0
NM_001012329	0
NM_001012331	0
NM_001012333	0
NM_001012334	0
NM_001012338	2
NM_001012339	0
NM_001012361	1
NM_001012393	0
NM_001012398	3
NM_001012409	2
NM_001012410	2
NM_001012411	2
NM_001012412	2
NM_001012413	2
NM_001012414	5
NM_001012415	0
NM_001012416	0
NM_001012417	5
NM_001012418	4
NM_001012421	0
NM_001012425	0
NM_001012426	2
NM_001012427	2
NM_001012428	0
NM_001012446	1
NM_001012454	2
NM_001012455	2
NM_001012456	0
NM_001012478	0
NM_001012503	0
NM_001012505	9
NM_001012506	3
NM_001012507	0
NM_001012508	0
NM_001012509	0
NM_001012511	0
NM_001012512	0
NM_001012513	0
NM_001012514	0
NM_001012515	0
NM_001012516	0
NM_001012614	3
NM_001012631	0
NM_001012632	0
NM_001012633	0
NM_001012634	0
NM_001012635	0
NM_001012636	0
NM_001012642	0
NM_001012644	5
NM_001012659	1
NM_001012662	2
NM_001012664	2
NM_001012706	29
NM_001012708	0
NM_001012710	0
NM_001012715	0
NM_001012716	0
NM_001012718	0
NM_001012720	0
NM_001012722	0
NM_001012727	0
NM_001012728	0
NM_001012729	0
NM_001012732	0
NM_001012750	1
NM_001012751	1
NM_001012752	1
NM_001012753	0
NM_001012754	2
NM_001012755	2
NM_001012756	15
NM_001012758	0
NM_001012759	0
NM_001012761	2
NM_001012762	0
NM_001012763	30
NM_001012957	0
NM_001012958	0
NM_001012959	0
NM_001012961	0
NM_001012964	0
NM_001012965	4
NM_001012967	1
NM_001012968	0
NM_001012969	3
NM_001012971	1
NM_001012977	6
NM_001012978	1
NM_001012979	0
NM_001012981	1
NM_001012984	0
NM_001012989	1
NM_001012990	4
NM_001012993	1
NM_001012994	0
NM_001013	0
NM_001013031	0
NM_001013251	1
NM_001013253	5
NM_001013254	9
NM_001013255	3
NM_001013257	0
NM_001013258	0
NM_001013398	1
NM_001013399	3
NM_001013403	0
NM_001013406	7
NM_001013415	2
NM_001013435	0
NM_001013436	0
NM_001013437	0
NM_001013438	1
NM_001013439	16
NM_001013579	0
NM_001013615	0
NM_001013619	0
NM_001013620	1
NM_001013622	3
NM_001013623	3
NM_001013628	0
NM_001013631	0
NM_001013635	1
NM_001013642	0
NM_001013647	5
NM_001013649	0
NM_001013650	0
NM_001013653	0
NM_001013657	1
NM_001013659	6
NM_001013660	4
NM_001013672	0
NM_001013692	0
NM_001013693	1
NM_001013694	0
NM_001013698	0
NM_001013699	0
NM_001013703	0
NM_001013706	0
NM_001013732	1
NM_001013734	0
NM_001013736	0
NM_001013739	5
NM_001013742	0
NM_001013746	6
NM_001013836	1
NM_001013837	1
NM_001013839	0
NM_001013841	0
NM_001013842	0
NM_001013843	0
NM_001013845	5
NM_001013848	0
NM_001014	1
NM_001014279	4
NM_001014283	0
NM_001014286	3
NM_001014291	1
NM_001014336	0
NM_001014380	0
NM_001014431	1
NM_001014432	1
NM_001014433	2
NM_001014434	0
NM_001014435	2
NM_001014436	0
NM_001014437	0
NM_001014440	2
NM_001014442	4
NM_001014443	6
NM_001014444	2
NM_001014445	12
NM_001014446	0
NM_001014447	0
NM_001014448	4
NM_001014449	3
NM_001014451	0
NM_001014763	2
NM_001014764	1
NM_001014765	5
NM_001014794	0
NM_001014795	0
NM_001014796	6
NM_001014797	2
NM_001014809	0
NM_001014811	0
NM_001014812	1
NM_001014831	6
[truncated: 25,816 more rows]
